# Supplementary material for: Needs of patients with parkinsonism and their caregivers: a protocol for the PRIME-UK cross-sectional study
Source: PubMed Central journal article supplement — BMJ Open. 2022 May 11;12(5):e057947. doi: 10.1136/bmjopen-2021-057947 (PMC9096540; doi:10.1136/bmjopen-2021-057947), 2022-05-11
Supplement: bmjopen-2021-057947.draft_revisions.pdf [file bmjopen-2021-057947.draft_revisions.pdf]

# BMJ Open

BMJ Open is committed to open peer review. As part of this commitment we make the peer review history of every article we publish publicly available.

When an article is published we post the peer reviewers' comments and the authors' responses online. We also post the versions of the paper that were used during peer review. These are the versions that the peer review comments apply to.

The versions of the paper that follow are the versions that were submitted during the peer review process. They are not the versions of record or the final published versions. They should not be cited or distributed as the published version of this manuscript.

BMJ Open is an open access journal and the full, final, typeset and author-corrected version of record of the manuscript is available on our site with no access controls, subscription charges or pay-per-view fees (<http://bmjopen.bmj.com>).

If you have any questions on BMJ Open's open peer review process please email [info.bmjopen@bmj.com](mailto:info.bmjopen@bmj.com)

# BMJ Open

## The needs of patients with parkinsonism and their caregivers: a protocol for the PRIME-UK cross-sectional study

|                               |                                                                                                                                                                                                                                                                                                                                                                                                                                                                                                                                                                                                                                                               |
|-------------------------------|---------------------------------------------------------------------------------------------------------------------------------------------------------------------------------------------------------------------------------------------------------------------------------------------------------------------------------------------------------------------------------------------------------------------------------------------------------------------------------------------------------------------------------------------------------------------------------------------------------------------------------------------------------------|
| Journal:                      | <i>BMJ Open</i>                                                                                                                                                                                                                                                                                                                                                                                                                                                                                                                                                                                                                                               |
| Manuscript ID                 | bmjopen-2021-057947                                                                                                                                                                                                                                                                                                                                                                                                                                                                                                                                                                                                                                           |
| Article Type:                 | Protocol                                                                                                                                                                                                                                                                                                                                                                                                                                                                                                                                                                                                                                                      |
| Date Submitted by the Author: | 02-Oct-2021                                                                                                                                                                                                                                                                                                                                                                                                                                                                                                                                                                                                                                                   |
| Complete List of Authors:     | Tenison, Emma; University of Bristol Faculty of Health Sciences, Population Health Sciences ; Royal United Hospitals Bath NHS Foundation Trust<br>Lithander, Fiona; University of Bristol Faculty of Health Sciences, Population Health Sciences<br>Smith, Matthew; University of Bristol Faculty of Health Sciences, Population Health Sciences ; Royal United Hospitals Bath NHS Foundation Trust<br>Brazier, Danielle; University of Bristol, Medical School<br>Ben-Shlomo, Yoav; University of Bristol Faculty of Health Sciences<br>Henderson, Emily; University of Bristol Faculty of Health Sciences; Royal United Hospitals Bath NHS Foundation Trust |
| Keywords:                     | Parkinson-s disease < NEUROLOGY, GERIATRIC MEDICINE, Dementia < NEUROLOGY                                                                                                                                                                                                                                                                                                                                                                                                                                                                                                                                                                                     |
|                               |                                                                                                                                                                                                                                                                                                                                                                                                                                                                                                                                                                                                                                                               |

SCHOLARONE™  
Manuscripts

1  
2  
3  
4  
5 The needs of patients with parkinsonism and their caregivers: a  
6  
7 protocol for the PRIME-UK cross-sectional study  
8  
9

10  
11 E. Tenison<sup>1</sup>, FE. Lithander<sup>1</sup>, MD. Smith<sup>1</sup>, DE. Brazier<sup>1</sup>, Y. Ben-Shlomo<sup>1</sup>, EJ. Henderson<sup>1,2</sup>  
12

13 *1. Department of Population Health Sciences, Bristol Medical School, University of Bristol, Bristol, United*  
14 *Kingdom*  
15

16 *2. Older People's Unit, Royal United Hospitals Bath NHS Foundation Trust, Combe Park, Bath, United*  
17 *Kingdom*  
18  
19

20  
21  
22  
23 **Word count:** 3705

24 *(The word count excludes the title page, abstract, tables, acknowledgements, contributions and*  
25 *references.)*  
26  
27

28  
29 Correspondence to:

30  
31 Emma Tenison  
32 Population Health Sciences  
33 1-5 Whiteladies Road  
34 Bristol  
35 BS8 1NU  
36 University of Bristol  
37 Tel: 0117 4283100  
38 Email: Emma.Tenison@bristol.ac.uk  
39  
40  
41  
42  
43  
44  
45  
46  
47  
48  
49  
50  
51  
52  
53  
54  
55  
56  
57  
58  
59  
60

## Abstract

### Introduction

People with parkinsonism (PwP) are a highly heterogeneous group and the condition encompasses a spectrum of motor and nonmotor symptoms which variably emerge and manifest across the disease course, fluctuate over time and negatively impact quality of life. Whilst parkinsonism is not directly the result of ageing, it is a condition that mostly affects older people, who may also be living with frailty and multimorbidity. This study aims to describe the broad range of health needs for PwP and their carers in relation to their symptomatology, disability, disease stage, comorbidities and sociodemographic characteristics.

### Methods and analysis

In this single site cross-sectional study, PwP will be sent a study information pack for themselves and their primary informal caregiver, if relevant. Data are collected via questionnaire, with additional support, if required, to maximise participation. A specific strategy has been developed to target and proactively recruit patients lacking capacity to consent, including those in residential care settings, with input from a personal consultee prior to completion of a bespoke questionnaire by a representative. Caregivers are also recruited to look at various health outcomes. Results will be displayed as descriptive statistics and regression models will be used to test simple associations and interactions.

### Ethics and dissemination

This protocol was approved by the London - Brighton & Sussex Research Ethics Committee (REC reference 20/LO/0890). The results of this protocol will be disseminated through publication in an international peer-reviewed journal; presentation at academic meetings and conferences; and a lay summary uploaded to the PRIME-Parkinson website.

## Article summary

### Strengths and limitations of this study

- This study aims to recruit typically under-represented individuals with parkinsonism, specifically those who lack capacity, in order to describe a more representative sample and address an area of unmet need
- This study involves a detailed and holistic phenotyping of people with parkinsonism, rather than focusing on any one motor or non-motor domain in conjunction with data from the perspective of a caregiver
- Despite efforts to design a specific approach to promote inclusion of hard-to-reach individuals, we acknowledge that non-response bias may impact the findings

- Given the cross-sectional design, it will not be possible to establish causality of any associations observed

## Introduction

Parkinson's disease (PD), the most common cause of parkinsonism, is the second most frequent neurodegenerative disease after Alzheimer's disease and is estimated to affect around 0.3% of the population in industrialised countries, rising to 1% in those aged over 60 years [1]. A meta-analysis of worldwide data on prevalence of Parkinson's disease showed rising prevalence with age from 41 per 100,000 people in those aged 40-49 years to 1,903 per 100,000 in those aged over 80 years [2].

People with parkinsonism (PwP) are a highly heterogeneous group [3] and the disease encompasses a spectrum of motor and non-motor symptoms, including fatigue, sleep disturbance, neuropsychiatric complications and cognitive impairment, which manifest across the disease course and fluctuate over time [4]. Whilst PD is not directly the result of ageing, it is a condition that more commonly affects older people [1], who are more likely to also be living with frailty and multimorbidity. Frailty and multimorbidity act synergistically to drive clinical complexity [5] and heighten the risk of adverse outcomes for older people with PD. The impact of multimorbidity on an individual's risk profile may be greater than the sum of conditions [6]. In order to fully appreciate the level of clinical complexity of people with PD, it is necessary to integrate the multifaceted problems they may experience, together with their frailty status and additional comorbidities.

PD impacts negatively on the physical and psychosocial wellbeing of those who care for or support these individuals [7]. As PD progresses, many individuals will require care and a large proportion of this is provided informally. In one study of patients with moderate to advanced parkinsonism, over 80% were receiving input from an informal caregiver, whilst only a quarter of people received formal domestic or personal care [8]. Increasing age, Hoehn and Yahr stage, non-motor symptom burden, and declining cognitive and physical function is associated with greater care need and, in turn, with worsening caregiver quality of life [9]. Caregivers are often older adults [9], so may themselves be living with frailty and multimorbidity, making them vulnerable to negative health outcomes which can limit their ability to provide informal support; thus studying the needs of, and supporting, caregivers is important to optimise the wellbeing of PwP.

The extent to which findings from many large observational studies of PwP can be extrapolated is limited as patients are frequently excluded on the bases of age, comorbidities, cognitive impairment or inability to consent. The COPPADIS (COhort of Patients with PARKinson's Disease in Spain) study restricted inclusion to those aged 30- 75 years and excluded patients with dementia (defined as a Mini-Mental State Examination score < 26) or who were unable to provide informed consent [10]. The international, multicentre Non-motor International Longitudinal Study (NILS) excluded patients with dementia or who were unable to consent [11]. Similarly, existing UK-based PD cohort studies have generally focused on patients with idiopathic PD, including the Discovery cohort which recruited from neurology clinics and excluded individuals if they were suspected to have non-idiopathic PD, Lewy Body dementia or had cognitive impairment which precluded consent [12]. The prospective, multicentre

1  
2  
3 Tracking Parkinson's cohort excluded those with other forms of parkinsonism or severe comorbid illness  
4 [13]. Even studies focusing on later stage PD are often not wholly inclusive: a Dutch cross-sectional study  
5 of nursing home residents with PD opted to exclude individuals with moderate to severe cognitive  
6 decline [14] and a cross-sectional study investigating the clinical burden of advanced PD required  
7 patients to be able to provide written informed consent [15]. This limits the generalisability of the  
8 findings and likely provides an overly optimistic clinical picture of PD.  
9  
10

11  
12  
13 In this study we aim to quantitatively describe the overall symptomatology and phenomenology of PwP,  
14 rather than focus on any one motor or non-motor symptom of the disease. Early studies focussed  
15 almost exclusively on the motor manifestations of Parkinson's with more recent work better profiling  
16 the non-motor aspects. However, more global aspects such as patient activation, nutritional risk, well-  
17 being and exploration of wider impacts on caregivers have been under-evaluated. [13]. We will recruit  
18 PwP who are additionally living with frailty, multimorbidity and cognitive impairment, in order to  
19 describe a representative population and address this area of unmet need. We will also gain vital  
20 information on the lived experience of caregivers by co-enrolling individuals who live with, care for, or  
21 support someone with parkinsonism. Understanding the profile of PwP in terms of their disease stage,  
22 symptom burden and multimorbidity, as well as characterising the population of caregivers associated  
23 with PwP will inform the development of a person-centered and individualised multi-component  
24 intervention and allow us to target patients and caregivers most at risk of adverse outcomes [16]. We  
25 will also use this cross-sectional study as a sampling frame whereby information on disease stage and  
26 health needs is utilised to stratify a subgroup of participants into a future randomised controlled trial of  
27 a new care model (PRIME) with an intervention that is targeted according to clinical complexity [17].  
28  
29  
30  
31

## 32 Methods and analysis

### 33 Study design and population

34  
35 This is a single centre, cross-sectional study. PwP living in the catchment area of Royal United Hospital  
36 Bath NHS Foundation Trust (RUH Bath), a district general hospital in the United Kingdom, will be  
37 recruited to the study over approximately 12-24 months from September 2020. We will also enrol  
38 primary informal caregivers of a patient with parkinsonism. A caregiver may participate in the study  
39 regardless of whether the person with parkinsonism, for whom they care, wishes to take part.  
40  
41  
42

43 The catchment area for the RUH Bath includes North-East Somerset, parts of South Gloucestershire and  
44 West Wiltshire. PwP are cared for by the separate Parkinson's specialist clinicians in the Older Person's  
45 Unit (OPU) and neurology teams with outpatient clinics at the RUH site; St Martin's Hospital in Bath; and  
46 Chippenham and Devizes in Wiltshire. Home visits to patients in residential care are also undertaken by  
47 the OPU Parkinson's clinicians.  
48  
49

### 50 Inclusion/exclusion criteria

51  
52  
53  
54  
55  
56  
57  
58  
59  
60

## Patient participants

### *Inclusion criteria*

- Have a diagnosis of parkinsonism (including idiopathic Parkinson's disease, progressive supranuclear palsy, corticobasal degeneration, multisystem atrophy, dementia with Lewy Bodies, vascular parkinsonism), made by a movement disorder specialist
- Be willing to participate
- Have the ability to provide informed consent to participate or, where unable to do so due to cognitive impairment, availability of a close friend or relative to act as a personal consultee.
- Be aged 18 years or over
- Live in the catchment area of RUH Bath

### *Exclusion criteria*

- Individuals with drug-induced parkinsonism
- Individuals who lack capacity to consent to participate but do not have anyone who can be a consultee to provide advice regarding their wishes and views
- Current medical, cognitive or psychosocial issue or co-enrolment in another study that, in the opinion of the site investigator, would interfere with adherence to study requirements

## Caregiver participants

### *Inclusion criteria:*

- Provide informal care or support for a patient with parkinsonism and, where a patient has more than one informal caregiver, be considered by the patient to be their primary caregiver
- Be willing to participate
- Have the ability to provide informed consent to participate
- Be aged 18 years or over

### *Exclusion criteria:*

- Professional carers, who are paid to deliver care

## Sampling and recruitment procedures

Potentially eligible participants will be identified from clinical lists and from lists of patients seen as new referrals within the movement disorder service at RUH Bath.

Patients who meet the eligibility criteria will be sent an invitation letter in the post, together with information about the study for them and for any informal caregiver. Willing patients/caregivers will be asked to complete the written consent form and return it by post to the study team at RUH Bath. Participants who do not respond to this invitation letter will receive one or more telephone calls from the clinical team. The purpose of these calls will be to answer any questions the patient may have about study participation; ascertain how the team can support the patient to participate should they wish to; and, where necessary, assess capacity to consent to taking part in the study. If the patient declines to participate, they will not receive further contact about this study.

## Adults lacking capacity to consent to participation in research

Patients will be assumed to have capacity to consent to the study unless there is evidence to suggest otherwise. If a capacity assessment is triggered, this will be conducted by telephone by a trained member of the team in accordance with the Mental Capacity Act 2005 two-stage test. If the potential participant does not have capacity to give consent to participate in the study, a personal consultee will be sought to review the requirements for study participation and offer advice on the wishes and views of the patient, including the patient's view on taking part in research at the time they had capacity. If the consultee advises that the person would have consented at a time they had capacity, they will be asked to sign the consultee declaration form. The personal consultee, or another close friend or relative of the person with parkinsonism, will be asked to complete questionnaires on behalf of the patient, acting as their "representative." We will not involve nominated consultees such as healthcare professionals or paid carers. Where no personal consultee is available, for example because the person lacking capacity has no family member or friend, or they are not willing to act as a personal consultee, the patient shall be excluded from the study.

## Data collection

### Methods of assessment

Recruited participants will complete a single questionnaire booklet at home during the study period. Where able, participants will self-complete the questionnaires. Questionnaire completion can also be facilitated over the telephone or in person to support individuals with, for example, visual impairment or tremor/dyskinesia limiting ability to write, to participate. Where participants have capacity but have a physical inability to mark responses on the questionnaire (e.g. due to tremor or bradykinesia), assistance with making a physical response can be undertaken by another person, which could include their paid carer, with the answer communicated by the participant.

PwP, who can provide informed consent to the study, will be asked to complete a full patient questionnaire booklet. For PwP who are unable to consent to the study, a specially designed and adapted patient questionnaire booklet, will be provided for their representative to complete on their behalf. Caregivers will be asked to complete the caregiver questionnaire booklet. A caregiver may, in some instances, complete a questionnaire booklet acting as the patient's representative and also complete a booklet answering questions about their experience of being a caregiver. The contents of all three questionnaire booklets are detailed in table 1.



Table 1: Contents of questionnaire booklets

| METRIC                                                                 | DATA                                                                                                           | PPT + | PPT -                | CG  |
|------------------------------------------------------------------------|----------------------------------------------------------------------------------------------------------------|-------|----------------------|-----|
| Demographics                                                           | Gender                                                                                                         | ✓     | ✓                    | ✓   |
|                                                                        | Date of birth                                                                                                  | ✓     | ✓                    | ✓   |
|                                                                        | Ethnicity                                                                                                      | ✓     | ✓                    | ✓   |
|                                                                        | Employment status                                                                                              | ✓     |                      | ✓   |
|                                                                        | Highest qualification                                                                                          | ✓     | ✓                    | ✓   |
|                                                                        | Marital status                                                                                                 | ✓     | ✓                    | ✓   |
|                                                                        | Living situation                                                                                               | ✓     | ✓                    | ✓   |
| Medication                                                             | Medication (name, dose, frequency, route)                                                                      | ✓     | ✓                    |     |
| Parkinson's history                                                    | Diagnosis                                                                                                      | ✓     | ✓                    |     |
|                                                                        | Year of diagnosis                                                                                              | ✓     | ✓                    |     |
|                                                                        | Laterality of first symptoms                                                                                   | ✓     | ✓                    |     |
|                                                                        | Advanced therapies                                                                                             | ✓     | ✓                    |     |
| General medical history                                                | Past medical history                                                                                           | ✓     | ✓                    |     |
|                                                                        | Healthcare contacts                                                                                            | ✓     | ✓                    |     |
|                                                                        | Falls and near falls                                                                                           | ✓     | ✓                    |     |
|                                                                        | Height, weight, weight 3-6 months ago                                                                          | ✓     | ✓                    | ✓   |
|                                                                        | Health status question                                                                                         |       |                      | ✓   |
| About the care                                                         | Relationship to recipient                                                                                      |       |                      | ✓   |
|                                                                        | Living with recipient                                                                                          |       |                      | ✓   |
|                                                                        | Intensity of caring and tasks of caring                                                                        |       |                      | ✓   |
|                                                                        | Duration of caring                                                                                             |       |                      | ✓   |
| Information about care recipient (if the patient is not participating) | Gender                                                                                                         |       |                      | (✓) |
|                                                                        | Age                                                                                                            |       |                      | (✓) |
|                                                                        | Living situation                                                                                               |       |                      | (✓) |
|                                                                        | Diagnosis                                                                                                      |       |                      | (✓) |
|                                                                        | Year of diagnosis                                                                                              |       |                      | (✓) |
| Nutritional risk                                                       | Seniors in the community: Risk Evaluation for Eating and Nutrition (SCREEN II)-14 item version [18-20]         | ✓     | ✓                    | ✓   |
| Frailty                                                                | Survey of Health, Ageing and Retirement in Europe (SHARE-FI) 75+ [21]                                          | ✓     | ✓                    | ✓   |
| Sarcopenia screen                                                      | SARC-F questionnaire [22]                                                                                      | ✓     | ✓                    | ✓   |
| Covid-19 questions                                                     | Symptoms, self-isolation/shielding, access to care                                                             | ✓     | ✓                    | ✓   |
| Lifestyle                                                              | Smoking                                                                                                        | ✓     | ✓                    |     |
|                                                                        | Alcohol intake                                                                                                 | ✓     | ✓                    |     |
|                                                                        | Physical activity                                                                                              | ✓     | ✓                    |     |
| Capability/wellbeing                                                   | ICEpop CAPability measure for Older People [23]                                                                | ✓     | ✓<br>(proxy version) |     |
| Quality of life                                                        | Parkinson's Disease Questionnaire-39 (PDQ-39) [24]                                                             | ✓     |                      |     |
| Non-motor symptom burden                                               | Non-Motor Symptom Questionnaire (NMSQ) [25]                                                                    | ✓     |                      |     |
| Autonomic symptoms                                                     | Scales for Outcomes in Parkinson's disease- autonomic dysfunction (SCOPA-AUT) [26]                             | ✓     |                      |     |
| Depression                                                             | Beck depression inventory-II (BDI-II) [27]                                                                     | ✓     |                      |     |
| Bowel function                                                         | Neurogenic bowel dysfunction score [28]                                                                        | ✓     |                      |     |
| Urinary tract symptoms                                                 | International Consultation on Incontinence Questionnaire: ICIQ-mLUTS (for men) and ICIQ-fLUTS (for women) [29] | ✓     |                      |     |
| Cognition                                                              | Test Your Memory [30]                                                                                          | ✓     |                      |     |

|                             |                                                                                                                      |   |   |   |
|-----------------------------|----------------------------------------------------------------------------------------------------------------------|---|---|---|
| Motor symptom burden        | Motor rating scale- adapted from Parveen [31]                                                                        | ✓ |   |   |
| Freezing of gait            | New Freezing of Gait (N-FOG) [32]                                                                                    | ✓ |   |   |
| Patient activation          | Patient Activation Measure [33]                                                                                      | ✓ |   |   |
| Symptoms and behaviour      | Neuropsychiatric Inventory [34]                                                                                      |   | ✓ |   |
| Activities of daily living  | Bristol Activities of Daily Living Scale [35]                                                                        |   | ✓ |   |
| Quality of life             | Parkinson's Disease Questionnaire (PDQ) carer [36]                                                                   |   |   | ✓ |
| Caregiver burden            | Zarit Burden Interview [37]                                                                                          |   |   | ✓ |
| Caregiver activation        | Caregiver PAM                                                                                                        |   |   | ✓ |
| Caregiver coping strategies | Brief Coping Orientation to Problems Experienced (BriefCOPE) [38]                                                    |   |   | ✓ |
| Perceived social support    | Multidimensional scale of perceived social support [39]                                                              |   |   | ✓ |
| PPT +                       | Participant with parkinsonism with capacity to consent to research                                                   |   |   |   |
| PPT-                        | Participant with parkinsonism without capacity to consent to research (questionnaires completed by a representative) |   |   |   |
| CG                          | Caregiver participant                                                                                                |   |   |   |

## Rationale for selected questionnaires

### *Measures for people with parkinsonism*

In order to capture the other comorbidities affecting PwP, we are using a list designed as a research tool for the self-report of chronic conditions in primary care [40].

The 39-item Parkinson's Disease Questionnaire (PDQ-39) is a Movement Disorder Society-recommended, PD-specific measure of health-related quality of life and has been well-validated and utilised in this population [41]. A well-being measure, ICECAP-O will be used to capture the broader impact of PD on participants. ICECAP-O is a relatively new measure of capability in older people which has been previously used in patients with PD [42]. A proxy version has been used to assess capability in older adults with cognitive impairment [43, 44] so this measure will be completed by a representative for PwP lacking capacity and unable to complete questionnaires.

Non-motor symptoms can be particularly troubling for patients and can negatively influence quality of life [45] and so are important to capture as part of this holistic and in-depth assessment. Whilst the Parkinson's Disease Nonmotor Symptoms Questionnaire (NMSQ) is a screening tool, rather than a rating instrument, it was selected for this study because it does not require rater administration and is relatively quick for participants to self-complete [46]. The Beck Depression Inventory (BDI-II) has been validated for use in PwP and is widely used to screen for depression and assess the severity of depression symptoms in the group [47].

1  
2  
3 The SCOPA AUT questionnaire has been included to characterise the burden of autonomic symptoms  
4 that are responsible for many non-motor symptoms. These can be diffuse and wide-reaching and  
5 include important yet seldom considered issues such as sexual function, as well common phenomena  
6 including orthostatic hypotension. Bladder symptoms contribute significantly to quality of life and will  
7 be further explored in more depth using the International Consultation on Incontinence Questionnaire  
8 male and female short form Lower Urinary Tract tools (mLUTS and fLUTS), which have been  
9 recommended for use in PD [29]. These broadly cover all urinary symptoms specific to each gender.  
10 Bowel symptoms will be similarly explored using the neurogenic bowel score [28].  
11  
12

13 Test Your Memory (TYM) is a self-administered cognitive screening test [48] which has been used  
14 amongst PwP and compared to the Montreal Cognitive Assessment (MoCA) [30].  
15

16 Self-reported motor symptoms will be captured using questions adapted from a motor rating form  
17 based on motor tasks from the Movement Disorder Society-Unified Parkinson's Disease Rating Scale  
18 (MDS-UPDRS) [31].  
19  
20

21 Freezing of gait is a common symptom, particularly in the advanced phases of PD, which can cause  
22 disability, negatively impact quality of life [49] and increase falls risk [50]. The New-Freezing of Gait  
23 Questionnaire (NFOG-Q) is a self-reported tool to assess the impact and severity of freezing symptoms  
24 [32].  
25

26 The Patient Activation Measure is a metric used to quantify the self-management capabilities of patients  
27 [51]. There is an increasing awareness that patients who have the knowledge, skills, and confidence to  
28 look after their health and feel empowered to do so have better health outcomes [51] and so it is  
29 important to gain an understanding of activation levels amongst PwP and their caregivers.  
30  
31

32 The Bristol Activities of Daily Living (Bristol ADL) has been shown to have good content and construct  
33 validity when used with people with dementia [35] and was one of only two scales rated as moderate  
34 quality in a systematic review of Activities of Daily Living scales in dementia and, of these, the only one  
35 suitable for self-completion by a caregiver [52]. This will allow the quantification of functional ability in  
36 participants who take part with a representative. Neuropsychiatric symptoms are a common feature of  
37 PD dementia and can negatively impact caregiver burden [53], hence particularly important to measure  
38 for participants with cognitive impairment. The questionnaire form of the Neuropsychiatric Inventory  
39 (NPI-Q) is a brief proxy-completed assessment [54].  
40  
41

42 Measures which have not been validated for proxy report, or for which it would not be feasible for  
43 someone to complete on behalf of the PwP, have not been included in the shorter patient questionnaire  
44 booklet for completion by a representative.  
45  
46  
47  
48

### 49 *Measures for caregivers*

50 Several tools will be used to measure caregiver burden and experience. The number of hours spent  
51 caregiving will be captured using a grid which allows the caregiver to document the hours spent on each  
52 of four categories of tasks, which are based on the categories included within the Caregiver Indirect and  
53 Informal Care Cost Assessment Questionnaire, developed by Landfeldt and colleagues [55]. Caregivers  
54  
55  
56  
57  
58  
59  
60

1  
2  
3 can report the hours spent on each day of the week to account for the fact that their input may differ  
4 throughout the week.  
5

6 The 21-item Zarit Burden Inventory is the most commonly used measure of caregiver burden amongst  
7 family caregivers of PwP [56]. The Parkinson's Disease Questionnaire (PDQ) carer has been specifically  
8 designed to measure quality of life amongst caregivers of PwP [36] and will be used in this study.  
9

10 The BriefCOPE is a frequently used coping scale and its subscales have been shown to predict distress  
11 and wellbeing [57]. The Multidimensional Scale of Perceived Social Support is a subjective assessment of  
12 social support [39]. Coping style may alter the way an informal caregiver deals with the challenges and  
13 stresses of caring and a caregiver's perception that they have good social support may have a protective  
14 effect [56].  
15  
16

### 17 18 19 *Measures used in all three groups* 20

21 There is evidence to suggest that PwP are at risk of weight loss and malnutrition [58]. Moreover,  
22 malnutrition is prevalent in older adults and is responsible for many significant health-related negative  
23 outcomes [59-61]. We will quantify nutrition risk using the Seniors in the community: risk evaluation for  
24 eating and nutrition, Version II (SCREEN-II) scale which is a valid and reliable tool to measure nutritional  
25 status.  
26

27 Frailty is a syndrome of loss of physiological reserve which confers greater vulnerability to negative  
28 health outcomes; it is considered to be a dynamic condition in which individuals may transition to an  
29 improved, as well as more advanced, frailty state [62]. The Frailty Instrument for Primary Care of the  
30 Survey of Health, Ageing and Retirement in Europe (SHARE) is a phenotypic frailty assessment tool; in  
31 this study, we have opted to use the SHARE tool which was developed and validated in those aged 75  
32 years and over, in which assessment of handgrip strength was substituted with a question about walking  
33 [21]. In the SHARE cohort, walking was assessed by a clinician; in this study, we have adapted the  
34 SHARE-FI75+ for self-reported completion. Sarcopenia, a disease characterised by low muscle strength,  
35 together with low muscle quantity or quality, may contribute to the development of physical frailty [63].  
36 SARC-F is a rapid screening tool for sarcopenia [22] which will be used.  
37  
38  
39

40 Caregivers are often older adults [9] and may themselves be living with frailty, sarcopenia and risk of  
41 malnutrition, hence the SARC-F, SHARE-FI75+ and SCREEN-II questionnaires will also be included in the  
42 caregiver questionnaire booklet, as well as the patient and representative-completed booklets.  
43

44 In order to contextualise the responses to other questionnaires collected in this study, we have  
45 compiled some questions to gather information about any symptoms of Covid-19 infection experienced  
46 by participants, whether they have had to self-isolate or shield, and their experience of accessing care  
47 during the pandemic.  
48  
49

### 50 *Sample size* 51

52 The sample size is pragmatic based on the total available number of potentially eligible PwP at this  
53 single centre. There are approximately 1,200 PwP who are within the geographical catchment of the  
54 RUH Bath. The likely response rate is unclear but we anticipate we will achieve a response rate of  
55 between 40- 70% which would result in 480- 840 completed patient questionnaires.  
56  
57

1  
2  
3 A previous cross-sectional postal survey noted a mean Parkinson's Disease Questionnaire-39 (PDQ-39)  
4 summary index score of 44.6 (SD 17.6) [64]. With a sample size of 480 we can estimate a mean PDQ-39  
5 score with the following precision of approximately +/- 3.3 points. This 95% confidence interval range is  
6 sufficiently precise for descriptive purposes. Further sub-groups e.g., by age group and gender will be  
7 less precise.  
8  
9

## 10 Statistical analysis

11  
12 Results will be displayed as descriptive statistics using mean plus standard deviation for normally  
13 distributed variables and median plus interquartile range for skewed variables. Linear and logistic  
14 regression models will be used to test simple associations. We presume we will show worse health  
15 needs and greater disability with increasing age and disease duration. However, we are specifically  
16 interested to test how these factors could potentially interact with gender, socioeconomic status and  
17 geography. Interaction tests will be specified a priori. We will use multiple imputation methods and  
18 other methods to deal with missing data.  
19  
20  
21  
22

## 23 Patient and public involvement statement

24  
25 This study has been designed and performed in conjunction with the study public involvement advisory  
26 group (PIAG). The PIAG been critical to the design and content of participant information leaflets and  
27 consent forms. Changes made as a result of the valuable contribution from PIAG contributors, all of  
28 whom have Parkinson's disease, includes:  
29

- 30 - Improved sensitivity around terminology for those who care for someone with PD,  
31 acknowledging that they may live with someone who has PD but not see themselves as a  
32 carer/caregiver, but may 'provide support'. The term 'caregiver' was preferred over 'carer' and  
33 therefore used throughout the study documentation.
- 34 - Inclusion of an approximate time to complete the questionnaires in the participant information  
35 leaflet and we further emphasized that the questionnaires are intended to be completed at  
36 home
- 37 - Inclusion of information for plans regarding dissemination of results to participants.  
38  
39  
40  
41  
42  
43

## 44 Ethics and dissemination

45 This protocol was approved by the London - Brighton & Sussex Research Ethics Committee on 27 July  
46 2020 (REC reference 20/LO/0890).  
47

48 All participants will either provide written informed consent or, in the case of patient participants who  
49 lack capacity to consent to participation in the study, a consultee will provide advice on their prior  
50 wishes and will sign a consultee declaration if they believe the patient would be willing to participate.  
51  
52

53 If the person with parkinsonism has opted not to participate themselves, it is necessary, so far as  
54 possible, for us to collect some basic information about who the caregiver supports. In this case, the  
55 person with PD (or their personal consultee if they lack capacity to make decisions about the study) is  
56  
57  
58  
59  
60

1  
2  
3 asked to sign a section on the back of the caregiver consent form if they are happy for their caregiver to  
4 provide basic information about them.  
5

6 Participants can choose to withdraw for any reason at any time during their involvement in the study  
7 and will not be followed up after withdrawal from the study. They will be asked their reason for  
8 withdrawal but do not have to provide this. Data collected up to the time of withdrawal will be used.  
9

10 We plan to publish the results of this protocol in an international peer-reviewed journal and at academic  
11 national and international meetings and conferences. When we share the results of key findings, we will  
12 upload a lay summary to the PRIME-Parkinson website.  
13  
14  
15

## 16 17 18 Authors' contributions

19 ET, FEL, YBS and EJH were responsible for the concept of the study and contributed to study  
20 development and design. ET, DEB and MDS contributed to patient recruitment. ET drafted the  
21 manuscript and all authors provided critical revision and approved the final protocol.  
22  
23

## 24 25 Funding statement

26 This work was supported by the Gatsby Charitable Foundation, grant number 3676.  
27  
28

## 29 30 Data statement

31 Access to the data will be available through application to the Chief Investigator. Pseudo-anonymised  
32 data may be shared with other researchers to enable meta-analyses.  
33  
34

## 35 36 Competing Interests Statement

37 EJH received funding from the National Institute of Health Technology (NIHR), the Gatsby Foundation  
38 and Parkinson's UK; received fees for speaking and consultancy from Profile pharma Medicys and Luye;  
39 and received travel support from Bial Abbvie and Ever pharma.  
40

41 YBS is a recipient of a Radboud Excellence award. He has received research support from the UK Medical  
42 Research Council, Wellcome Trust, NIHR, Parkinson's UK, Versus Arthritis, Gatsby Foundation, Dunhill  
43 Trust, and received a Radboud Excellence Award.  
44  
45

46 All other authors declare that they have no competing interests.  
47  
48

## 49 50 Acknowledgements

51 None  
52  
53  
54  
55  
56  
57  
58  
59  
60

## References

1. de Lau LM, Breteler MM. Epidemiology of Parkinson's disease. *Lancet Neurol*. 2006;5(6):525-35.
2. Pringsheim T, Jette N, Frolkis A, Steeves TDL. The prevalence of Parkinson's disease: a systematic review and meta-analysis. *Movement Disorders*.29(13):1583-90.
3. Ryden LE, Lewis SJG. Parkinson's Disease in the Era of Personalised Medicine: One Size Does Not Fit All. *Drugs Aging*. 2019;36(2):103-13.
4. Schapira AHV, Chaudhuri KR, Jenner P. Non-motor features of Parkinson disease. *Nat Rev Neurosci*. 2017;18(8):509.
5. Shippee ND, Shah ND, May CR, Mair FS, Montori VM. Cumulative complexity: a functional, patient-centered model of patient complexity can improve research and practice. *J Clin Epidemiol*. 2012;65(10):1041-51.
6. Cesari M, Perez-Zepeda MU, Marzetti E. Frailty and Multimorbidity: Different Ways of Thinking About Geriatrics. *J Am Med Dir Assoc*. 2017;18(4):361-4.
7. Greenwell K, Gray WK, van Wersch A, van Schaik P, Walker R. Predictors of the psychosocial impact of being a carer of people living with Parkinson's disease: a systematic review. *Parkinsonism & Related Disorders*.21(1):1-11.
8. Hand A, Oates LL, Gray WK, Walker RW. Understanding the Care Needs and Profile of People Living at Home With Moderate to Advanced Stage Parkinson Disease. *Journal of Geriatric Psychiatry & Neurology*.31(5):237-47.
9. Hand A, Oates LL, Gray WK, Walker RW. The role and profile of the informal carer in meeting the needs of people with advancing Parkinson's disease. *Aging Ment Health*. 2019;23(3):337-44.
10. Santos-Garcia D, de Deus Fonticoba T, Suarez Castro E, Aneiros Diaz A, McAfee D, Catalan MJ, et al. Non-motor symptom burden is strongly correlated to motor complications in patients with Parkinson's disease. *Eur J Neurol*. 2020;27(7):1210-23.
11. van Wamelen DJ, Sauerbier A, Leta V, Rodriguez-Blazquez C, Falup-Pecurariu C, Rodriguez-Violante M, et al. Cross-sectional analysis of the Parkinson's disease Non-motor International Longitudinal Study baseline non-motor characteristics, geographical distribution and impact on quality of life. *Sci Rep*. 2021;11(1):9611.
12. Szewczyk-Krolkowski K, Tomlinson P, Nithi K, Wade-Martins R, Talbot K, Ben-Shlomo Y, et al. The influence of age and gender on motor and non-motor features of early Parkinson's

disease: initial findings from the Oxford Parkinson Disease Center (OPDC) discovery cohort. *Parkinsonism Relat Disord.* 2014;20(1):99-105.

13. Malek N, Swallow DM, Grosset KA, Lawton MA, Marrinan SL, Lehn AC, et al. Tracking Parkinson's: Study Design and Baseline Patient Data. *J Parkinsons Dis.* 2015;5(4):947-59.

14. Weerkamp NJ, Tissingh G, Poels PJ, Zuidema SU, Munneke M, Koopmans RT, et al. Nonmotor symptoms in nursing home residents with Parkinson's disease: prevalence and effect on quality of life. *J Am Geriatr Soc.* 2013;61(10):1714-21.

15. Fasano A, Fung VSC, Lopiano L, Elibol B, Smolentseva IG, Seppi K, et al. Characterizing advanced Parkinson's disease: OBSERVE-PD observational study results of 2615 patients. *BMC Neurol.* 2019;19(1):50.

16. Tenison E, Smink A, Redwood S, Darweesh S, Cottle H, van Halteren A, et al. Proactive and Integrated Management and Empowerment in Parkinson's Disease: Designing a New Model of Care. *Parkinsons Dis.* 2020;2020:8673087.

17. Lithander FE TE, Ypinga JHL, van Halteren AD, Smith MD, Richfield EW, Redwood S, Brazier DE, Ó Breasail M, Smink AJ, Metcalfe , Taylor J, Hollingworth W, Bloem BR, Munneke M, Ben-Shlomo Y, Darweesh SKL, Henderson EJ Proactive and Integrated Management and Empowerment in Parkinson's Disease (PRIME): Designing a New Model of Care: protocol for a randomised controlled trial (under review). 2021.

18. Keller HH, Goy R, Kane SL. Validity and reliability of SCREEN II (Seniors in the community: risk evaluation for eating and nutrition, Version II). *Eur J Clin Nutr.* 2005;59(10):1149-57.

19. Keller HH, McKenzie JD, Goy RE. Construct validation and test-retest reliability of the seniors in the community: risk evaluation for eating and nutrition questionnaire. *J Gerontol A Biol Sci Med Sci.* 2001;56(9):M552-8.

20. Wham CA, Redwood KM, Kerse N. Validation of the nutrition screening tool 'Seniors in the Community: Risk Evaluation for Eating and Nutrition, version II' among octogenarians. *J Nutr Health Aging.* 2014;18(1):39-43.

21. Romero-Ortuno R, Soraghan C. A Frailty Instrument for primary care for those aged 75 years or more: findings from the Survey of Health, Ageing and Retirement in Europe, a longitudinal population-based cohort study (SHARE-FI75+). *BMJ Open.* 2014;4(12):e006645.

22. Malmstrom TK, Morley JE. SARC-F: a simple questionnaire to rapidly diagnose sarcopenia. *J Am Med Dir Assoc.* 2013;14(8):531-2.



23. Coast J, Flynn TN, Natarajan L, Sproston K, Lewis J, Louviere JJ, et al. Valuing the ICECAP capability index for older people. *Social Science & Medicine*. 2008;67(5):874-82.
24. Peto V, Jenkinson C, Fitzpatrick R, Greenhall R. The development and validation of a short measure of functioning and well being for individuals with Parkinson's disease. *Qual Life Res*. 1995;4(3):241-8.
25. Martinez-Martin P, Schapira AH, Stocchi F, Sethi K, Odin P, MacPhee G, et al. Prevalence of nonmotor symptoms in Parkinson's disease in an international setting; study using nonmotor symptoms questionnaire in 545 patients. *Mov Disord*. 2007;22(11):1623-9.
26. Visser M, Marinus J, Stiggelbout AM, Van Hilten JJ. Assessment of autonomic dysfunction in Parkinson's disease: the SCOPA-AUT. *Mov Disord*. 2004;19(11):1306-12.
27. Beck AT, Ward CH, Mendelson M, Mock J, Erbaugh J. An inventory for measuring depression. *Arch Gen Psychiatry*. 1961;4:561-71.
28. Krogh K, Christensen P, Sabroe S, Laurberg S. Neurogenic bowel dysfunction score. *Spinal Cord*. 2006;44(10):625-31.
29. Pavy-Le Traon A, Cotterill N, Amarenco G, Duerr S, Kaufmann H, Lahrmann H, et al. Clinical Rating Scales for Urinary Symptoms in Parkinson Disease: Critique and Recommendations. *Mov Disord Clin Pract*. 2018;5(5):479-91.
30. Henderson EJ, Chu H, Gaunt DM, Whone AL, Ben-Shlomo Y, Lyell V. Comparison of Test Your Memory and Montreal Cognitive Assessment Measures in Parkinson's Disease. *Parkinsons Dis*. 2016;2016:1012847.
31. Parveen S. Comparison of self and proxy ratings for motor performance of individuals with Parkinson disease. *Brain and Cognition*. 2016;103:62-9.
32. Nieuwboer A, Rochester L, Herman T, Vandenberghe W, Emil GE, Thomaes T, et al. Reliability of the new freezing of gait questionnaire: Agreement between patients with Parkinson's disease and their carers. *Gait & Posture*. 2009;30(4):459-63.
33. Hibbard JH, Mahoney ER, Stockard J, Tusler M. Development and testing of a short form of the patient activation measure. *Health Services Research*. 2005;40(6):1918-30.
34. Cummings JL, Mega M, Gray K, Rosenberg-Thompson S, Carusi DA, Gornbein J. The Neuropsychiatric Inventory: comprehensive assessment of psychopathology in dementia. *Neurology*. 1994;44(12):2308-14.
35. Bucks RS, Ashworth DL, Wilcock GK, Siegfried K. Assessment of activities of daily living in dementia: Development of the Bristol activities of daily living scale. *Age and Ageing*. 1996;25(2):113-20.

- 1  
2  
3  
4 36. Jenkinson C, Dummett S, Kelly L, Peters M, Dawson J, Morley D, et al. The  
5 development and validation of a quality of life measure for the carers of people with Parkinson's  
6 disease (the PDQ-Carer). *Parkinsonism Relat Disord*. 2012;18(5):483-7.
- 7  
8 37. Zarit SH, Reever KE, Bachpeterson J. Relatives of the Impaired Elderly - Correlates of  
9 Feelings of Burden. *Gerontologist*. 1980;20(6):649-55.
- 10  
11 38. Carver CS. You want to measure coping but your protocol's too long: consider the brief  
12 COPE. *Int J Behav Med*. 1997;4(1):92-100.
- 13  
14 39. Zimet GD, Powell SS, Farley GK, Werkman S, Berkoff KA. Psychometric Characteristics  
15 of the Multidimensional Scale of Perceived Social Support. *Journal of Personality Assessment*.  
16 1990;55(3-4):610-7.
- 17  
18 40. Fortin M, Almirall J, Nicholson K. Development of a research tool to document self-  
19 reported chronic conditions in primary care. *J Comorb*. 2017;7(1):117-23.
- 20  
21 41. Martinez-Martin P, Jeukens-Visser M, Lyons KE, Rodriguez-Blazquez C, Selai C,  
22 Siderowf A, et al. Health-related quality-of-life scales in Parkinson's disease: critique and  
23 recommendations. *Mov Disord*. 2011;26(13):2371-80.
- 24  
25 42. Xin Y, Lewsey J, Gray R, Clarke CE, McIntosh E. Broadening the evaluative scope of  
26 quality of life in Parkinson's: Testing the construct validity of the ICECAP-O instrument  
27 [abstract]. *International Parkinson's Disease and Movement Disorder Society Meeting*  
28 abstracts *Mov Disord*.; 2016.
- 29  
30 43. Makai P, Brouwer WB, Koopmanschap MA, Nieboer AP. Capabilities and quality of life  
31 in Dutch psycho-geriatric nursing homes: an exploratory study using a proxy version of the  
32 ICECAP-O. *Qual Life Res*. 2012;21(5):801-12.
- 33  
34 44. Makai P, Beckebans F, van Exel J, Brouwer WB. Quality of life of nursing home  
35 residents with dementia: validation of the German version of the ICECAP-O. *PLoS One*.  
36 2014;9(3):e92016.
- 37  
38 45. Chaudhuri KR, Schrag A, Weintraub D, Rizos A, Rodriguez-Blazquez C, Mamikonyan E,  
39 et al. The Movement Disorder Society Nonmotor Rating Scale: Initial Validation Study. *Mov*  
40 *Disord*. 2019.
- 41  
42 46. Chaudhuri KR, Martinez-Martin P, Schapira AH, Stocchi F, Sethi K, Odin P, et al.  
43 International multicenter pilot study of the first comprehensive self-completed nonmotor  
44 symptoms questionnaire for Parkinson's disease: the NMSQuest study. *Mov Disord*.  
45 2006;21(7):916-23.
- 46  
47  
48  
49  
50  
51  
52  
53  
54  
55  
56  
57  
58  
59  
60

- 1  
2  
3  
4 47. Schrag A, Barone P, Brown RG, Leentjens AF, McDonald WM, Starkstein S, et al.  
5 Depression rating scales in Parkinson's disease: critique and recommendations. *Mov Disord*.  
6 2007;22(8):1077-92.
- 7  
8 48. Brown J, Pengas G, Dawson K, Brown LA, Clatworthy P. Self administered cognitive  
9 screening test (TYM) for detection of Alzheimer's disease: cross sectional study. *BMJ*.  
10 2009;338:b2030.
- 11  
12 49. Moore O, Peretz C, Giladi N. Freezing of gait affects quality of life of peoples with  
13 Parkinson's disease beyond its relationships with mobility and gait. *Mov Disord*.  
14 2007;22(15):2192-5.
- 15  
16 50. Lim I, van Wegen E, Jones D, Rochester L, Nieuwboer A, Willems AM, et al. Identifying  
17 fallers with Parkinson's disease using home-based tests: who is at risk? *Mov Disord*.  
18 2008;23(16):2411-5.
- 19  
20 51. Greene J, Hibbard JH, Sacks R, Overton V, Parrotta CD. When patient activation levels  
21 change, health outcomes and costs change, too. *Health Aff (Millwood)*. 2015;34(3):431-7.
- 22  
23 52. Sikkes SA, de Lange-de Klerk ES, Pijnenburg YA, Scheltens P, Uitdehaag BM. A  
24 systematic review of Instrumental Activities of Daily Living scales in dementia: room for  
25 improvement. *J Neurol Neurosurg Psychiatry*. 2009;80(1):7-12.
- 26  
27 53. Martinez-Martin P, Rodriguez-Blazquez C, Forjaz MJ, Frades-Payo B, Aguera-Ortiz L,  
28 Weintraub D, et al. Neuropsychiatric symptoms and caregiver's burden in Parkinson's disease.  
29 *Parkinsonism Relat Disord*. 2015;21(6):629-34.
- 30  
31 54. Kaufer DI, Cummings JL, Ketchel P, Smith V, MacMillan A, Shelley T, et al. Validation of  
32 the NPI-Q, a brief clinical form of the Neuropsychiatric Inventory. *J Neuropsychiatry Clin  
33 Neurosci*. 2000;12(2):233-9.
- 34  
35 55. Landfeldt E, Zethraeus N, Lindgren P. Standardized Questionnaire for the Measurement,  
36 Valuation, and Estimation of Costs of Informal Care Based on the Opportunity Cost and Proxy  
37 Good Method. *Appl Health Econ Health Policy*. 2019;17(1):15-24.
- 38  
39 56. Mosley PE, Moodie R, Dissanayaka N. Caregiver Burden in Parkinson Disease: A  
40 Critical Review of Recent Literature. *J Geriatr Psychiatry Neurol*. 2017;30(5):235-52.
- 41  
42 57. Kato T. Frequently Used Coping Scales: A Meta-Analysis. *Stress Health*.  
43 2015;31(4):315-23.
- 44  
45 58. van der Marck MA, Dicke HC, Uc EY, Kentin ZH, Borm GF, Bloem BR, et al. Body mass  
46 index in Parkinson's disease: a meta-analysis. *Parkinsonism Relat Disord*. 2012;18(3):263-7.
- 47  
48  
49  
50  
51  
52  
53  
54  
55  
56  
57  
58  
59  
60

- 1  
2  
3  
4 59. Rullier L, Lagarde A, Bouisson J, Bergua V, Torres M, Barberger-Gateau P.  
5 Psychosocial correlates of nutritional status of family caregivers of persons with dementia. *Int*  
6 *Psychogeriatr*. 2014;26(1):105-13.  
7  
8 60. Margetts BM, Thompson RL, Elia M, Jackson AA. Prevalence of risk of undernutrition is  
9 associated with poor health status in older people in the UK. *Eur J Clin Nutr*. 2003;57(1):69-74.  
10  
11 61. Volkert D, Beck AM, Cederholm T, Cereda E, Cruz-Jentoft A, Goisser S, et al.  
12 Management of Malnutrition in Older Patients-Current Approaches, Evidence and Open  
13 Questions. *J Clin Med*. 2019;8(7).  
14  
15 62. Hoogendijk EO, Afilalo J, Ensrud KE, Kowal P, Onder G, Fried LP. Frailty: implications  
16 for clinical practice and public health. *Lancet*. 2019;394(10206):1365-75.  
17  
18 63. Cruz-Jentoft AJ, Baeyens JP, Bauer JM, Boirie Y, Cederholm T, Landi F, et al.  
19 Sarcopenia: European consensus on definition and diagnosis: Report of the European Working  
20 Group on Sarcopenia in Older People. *Age Ageing*. 2010;39(4):412-23.  
21  
22 64. Jenkinson C, Fitzpatrick R, Peto V, Greenhall R, Hyman N. The Parkinson's Disease  
23 Questionnaire (PDQ-39): development and validation of a Parkinson's disease summary index  
24 score. *Age Ageing*. 1997;26(5):353-7.  
25  
26  
27  
28  
29  
30  
31  
32  
33  
34  
35  
36  
37  
38  
39  
40  
41  
42  
43  
44  
45  
46  
47  
48  
49  
50  
51  
52  
53  
54  
55  
56  
57  
58  
59  
60

# BMJ Open

## The needs of patients with parkinsonism and their caregivers: a protocol for the PRIME-UK cross-sectional study

|                                 |                                                                                                                                                                                                                                                                                                                                                                                                                                                                                                                                                                                                                                                                                                             |
|---------------------------------|-------------------------------------------------------------------------------------------------------------------------------------------------------------------------------------------------------------------------------------------------------------------------------------------------------------------------------------------------------------------------------------------------------------------------------------------------------------------------------------------------------------------------------------------------------------------------------------------------------------------------------------------------------------------------------------------------------------|
| Journal:                        | <i>BMJ Open</i>                                                                                                                                                                                                                                                                                                                                                                                                                                                                                                                                                                                                                                                                                             |
| Manuscript ID                   | bmjopen-2021-057947.R1                                                                                                                                                                                                                                                                                                                                                                                                                                                                                                                                                                                                                                                                                      |
| Article Type:                   | Protocol                                                                                                                                                                                                                                                                                                                                                                                                                                                                                                                                                                                                                                                                                                    |
| Date Submitted by the Author:   | 22-Mar-2022                                                                                                                                                                                                                                                                                                                                                                                                                                                                                                                                                                                                                                                                                                 |
| Complete List of Authors:       | Tenison, Emma; University of Bristol Faculty of Health Sciences, Population Health Sciences ; Royal United Hospitals Bath NHS Foundation Trust<br>Lithander, Fiona; University of Bristol Faculty of Health Sciences, Population Health Sciences; The University of Auckland Liggins Institute<br>Smith, Matthew; University of Bristol Faculty of Health Sciences, Population Health Sciences ; Royal United Hospitals Bath NHS Foundation Trust<br>Brazier, Danielle; University of Bristol, Medical School<br>Ben-Shlomo, Yoav; University of Bristol Faculty of Health Sciences<br>Henderson, Emily; University of Bristol Faculty of Health Sciences; Royal United Hospitals Bath NHS Foundation Trust |
| <b>Primary Subject Heading</b>: | Geriatric medicine                                                                                                                                                                                                                                                                                                                                                                                                                                                                                                                                                                                                                                                                                          |
| Secondary Subject Heading:      | Neurology, Patient-centred medicine                                                                                                                                                                                                                                                                                                                                                                                                                                                                                                                                                                                                                                                                         |
| Keywords:                       | Parkinson-s disease < NEUROLOGY, GERIATRIC MEDICINE, Dementia < NEUROLOGY                                                                                                                                                                                                                                                                                                                                                                                                                                                                                                                                                                                                                                   |
|                                 |                                                                                                                                                                                                                                                                                                                                                                                                                                                                                                                                                                                                                                                                                                             |

SCHOLARONE™  
Manuscripts

# The needs of patients with parkinsonism and their caregivers: a protocol for the PRIME-UK cross-sectional study

E. Tenison<sup>1</sup>, FE. Lithander<sup>1,2</sup>, MD. Smith<sup>1</sup>, DE. Brazier<sup>1</sup>, Y. Ben-Shlomo<sup>1</sup>, EJ. Henderson<sup>1,3</sup>

*1. Department of Population Health Sciences, Bristol Medical School, University of Bristol, Bristol, United Kingdom*

*2. The Liggins Institute, The University of Auckland, 85 Park Road, Grafton, Auckland 1023, New Zealand*

*3. Older People's Unit, Royal United Hospitals Bath NHS Foundation Trust, Combe Park, Bath, United Kingdom*

Correspondence to:

Emma Tenison  
Population Health Sciences  
1-5 Whiteladies Road  
Bristol  
BS8 1NU  
University of Bristol  
Tel: 0117 4283100  
Email: Emma.Tenison@bristol.ac.uk

## Abstract

### Introduction

People with parkinsonism are a highly heterogeneous group and the disease encompasses a spectrum of motor and nonmotor symptoms which variably emerge and manifest across the disease course, fluctuate over time and negatively impact quality of life. Whilst parkinsonism is not directly the result of ageing, it is a condition that mostly affects older people, who may also be living with frailty and multimorbidity. This study aims to describe the broad range of health needs for people with parkinsonism and their carers in relation to their symptomatology, disability, disease stage, comorbidities and sociodemographic characteristics.

### Methods and analysis

In this single site cross-sectional study, people with parkinsonism will be sent a study information pack for themselves and their primary informal caregiver, if relevant. Data are collected via questionnaire, with additional support, if required, to maximise participation. A specific strategy has been developed to target and proactively recruit patients lacking capacity to consent, including those in residential care settings, with input from a personal consultee prior to completion of a bespoke questionnaire by a representative. Caregivers are also recruited to look at various health outcomes. Results will be displayed as descriptive statistics and regression models will be used to test simple associations and interactions.

### Ethics and dissemination

This protocol was approved by the London - Brighton & Sussex Research Ethics Committee (REC reference 20/LO/0890). The results of this protocol will be disseminated through publication in an international peer-reviewed journal; presentation at academic meetings and conferences; and a lay summary uploaded to the PRIME-Parkinson website.

## Article summary

### Strengths and limitations of this study

- This study aims to recruit typically under-represented individuals with parkinsonism, specifically those who lack capacity, in order to describe a more representative sample and address an area of unmet need
- This study involves a detailed and holistic phenotyping of people with parkinsonism, rather than focusing on any one motor or non-motor domain in conjunction with data from the perspective of a caregiver
- Despite efforts to design a specific approach to promote inclusion of hard-to-reach individuals, we acknowledge that non-response bias may impact the findings

- Given the cross-sectional design, it will not be possible to establish causality of any associations observed

## Introduction

Parkinson's disease (PD), the most common cause of parkinsonism, is the second most frequent neurodegenerative disease after Alzheimer's disease and is estimated to affect around 0.3% of the population in industrialised countries, rising to 1% in those aged over 60 years [1]. A meta-analysis of worldwide data on prevalence of Parkinson's disease showed rising prevalence with age from 41 per 100,000 people in those aged 40-49 years to 1,903 per 100,000 in those aged over 80 years [2].

People with parkinsonism are a highly heterogeneous group [3] and the disease encompasses a spectrum of motor and non-motor symptoms, including fatigue, sleep disturbance, neuropsychiatric complications and cognitive impairment, which manifest across the disease course and fluctuate over time [4]. Whilst PD is not directly the result of ageing, it is a condition that more commonly affects older people [1], who are more likely to also be living with frailty and multimorbidity. Frailty and multimorbidity act synergistically to drive clinical complexity [5] and heighten the risk of adverse outcomes for older people with PD. The impact of multimorbidity on an individual's risk profile may be greater than the sum of conditions [6]. In order to fully appreciate the level of clinical complexity of people with PD, it is necessary to integrate the multifaceted problems they may experience, together with their frailty status and additional comorbidities.

PD impacts negatively on the physical and psychosocial wellbeing of those who care for or support these individuals [7]. As PD progresses, many individuals will require care and a large proportion of this is provided informally. In one study of patients with moderate to advanced parkinsonism, over 80% were receiving input from an informal caregiver, whilst only a quarter of people received formal domestic or personal care [8]. Increasing age, functional disability, non-motor symptom burden, and declining cognitive and physical function are associated with greater care need and, in turn, with worsening caregiver quality of life [9]. Caregivers are often older adults [9], so may themselves be living with frailty and multimorbidity, making them vulnerable to negative health outcomes which can limit their ability to provide informal support; thus studying the needs of, and supporting, caregivers is important to optimise the wellbeing of people with parkinsonism.

The extent to which findings from many large observational studies of people with parkinsonism can be extrapolated is limited as patients are frequently excluded on the bases of age, comorbidities, cognitive impairment or inability to consent. The COPPADIS (COhort of Patients with PARKinson's Disease in Spain) study restricted inclusion to those aged 30- 75 years and excluded patients with dementia (defined as a Mini-Mental State Examination score < 26) or who were unable to provide informed consent [10]. The international, multicentre Non-motor International Longitudinal Study (NILS) excluded patients with dementia or who were unable to consent [11]. Similarly, existing UK-based PD cohort studies have generally focused on patients with idiopathic PD, including the Discovery cohort which recruited from neurology clinics and excluded individuals if they were suspected to have non-idiopathic PD, Lewy Body dementia or had cognitive impairment which precluded consent [12]. The prospective, multicentre



1  
2  
3 Tracking Parkinson's cohort excluded those with other forms of parkinsonism or severe comorbid illness  
4 [13]. It is, however, encouraging to note that some ongoing biomarker development cohorts are taking  
5 an inclusive approach towards recruitment, including the Cincinnati Biomarker Program which is  
6 enrolling participants with any form of parkinsonism or dementia, at any disease stage, though  
7 participant burden may implicitly exclude some participants [14]. Even studies focusing on later stage PD  
8 are often not wholly inclusive: a Dutch cross-sectional study of nursing home residents with PD opted to  
9 exclude individuals with moderate to severe cognitive decline [15] and a cross-sectional study  
10 investigating the clinical burden of advanced PD required patients to be able to provide written  
11 informed consent [16]. This limits the generalisability of the findings and likely provides an overly  
12 optimistic clinical picture of PD.  
13  
14  
15  
16  
17

18 In this study we aim to quantitatively describe the overall symptomatology and phenomenology of  
19 people with parkinsonism, rather than focus on any one motor or non-motor symptom of the disease.  
20 Early studies focussed almost exclusively on the motor manifestations of Parkinson's with more recent  
21 work better profiling the non-motor aspects [17]. However, more global aspects such as patient  
22 activation, nutritional risk, well-being and exploration of wider impacts on caregivers have been under-  
23 evaluated. We will recruit people with parkinsonism who are additionally living with frailty,  
24 multimorbidity and cognitive impairment, in order to describe a representative population and address  
25 this area of unmet need. We will also gain vital information on the lived experience of caregivers by co-  
26 enrolling individuals who live with, care for, or support someone with parkinsonism. Understanding the  
27 profile of people with parkinsonism in terms of their disease stage, symptom burden and  
28 multimorbidity, as well as characterising the population of caregivers associated with people with  
29 parkinsonism will inform the development of a person-centered and individualised multi-component  
30 intervention and allow us to target patients and caregivers most at risk of adverse outcomes [18]. We  
31 will also use this cross-sectional study as a sampling frame whereby information on disease stage and  
32 health needs is utilised to stratify a subgroup of participants into a future randomised controlled trial of  
33 a new care model (PRIME) with an intervention that is targeted according to clinical complexity [19].  
34  
35  
36  
37  
38

## 39 Methods and analysis

### 40 Study design and population

41 This is a single centre, cross-sectional study. People with parkinsonism living in the catchment area of  
42 Royal United Hospital Bath NHS Foundation Trust (RUH Bath), a district general hospital in the United  
43 Kingdom, will be recruited to the study over approximately 12-24 months from September 2020. We will  
44 also enrol primary informal caregivers of a patient with parkinsonism. A person with parkinsonism may  
45 take part in the study regardless of whether they have an informal caregiver and, if they do, whether  
46 this person wishes to take part. Likewise, a caregiver may participate regardless of whether the person  
47 with parkinsonism, for whom they care, wishes to take part.  
48  
49  
50  
51

52 The catchment area for the RUH Bath includes North-East Somerset, parts of South Gloucestershire and  
53 West Wiltshire. People with parkinsonism are cared for by the separate Parkinson's specialist clinicians  
54 in the Older Person's Unit (OPU) and neurology teams with outpatient clinics at the RUH site; St Martin's  
55  
56  
57  
58  
59  
60

Hospital in Bath; and Chippenham and Devizes in Wiltshire. Home visits to patients in residential care are also undertaken by the OPU Parkinson's clinicians.

## Inclusion/exclusion criteria

### Patient participants

#### *Inclusion criteria*

- Have a diagnosis of parkinsonism (including idiopathic Parkinson's disease, progressive supranuclear palsy, corticobasal degeneration, multisystem atrophy, dementia with Lewy Bodies, vascular parkinsonism), made by a movement disorder specialist (a physician sub-specialising in neurology or geriatric medicine)
- Be willing to participate
- Have the ability to provide informed consent to participate or, where unable to do so due to cognitive impairment, availability of a close friend or relative to act as a personal consultee.
- Be aged 18 years or over
- Live in the catchment area of RUH Bath

#### *Exclusion criteria*

- Individuals with drug-induced parkinsonism
- Individuals who lack capacity to consent to participate but do not have anyone who can be a consultee to provide advice regarding their wishes and views
- Current medical, cognitive or psychosocial issue or co-enrolment in another study that, in the opinion of the site investigator, would interfere with adherence to study requirements (e.g. individuals in the last days/weeks of life)

### Caregiver participants

#### *Inclusion criteria:*

- Provide informal care or support for a patient with parkinsonism and, where a patient has more than one informal caregiver, be considered by the patient to be their primary caregiver
- Be willing to participate
- Have the ability to provide informed consent to participate
- Be aged 18 years or over

#### *Exclusion criteria:*

- Professional carers, who are paid to deliver care

## Sampling and recruitment procedures

Potentially eligible participants will be identified from lists of patients coded with parkinsonism during an inpatient admission and from lists of patients followed up or seen as a new referral within the movement disorder services at the main regional hospital (RUH Bath) and ancillary clinics within the surrounding area.

Patients who meet the eligibility criteria will be sent an invitation letter, by the study team on behalf of their Parkinson's clinician, in the post, together with information about the study for them and for any informal caregiver. Willing patients/caregivers will be asked to complete the written consent form and return it by post to the study team at RUH Bath. Participants who do not respond to this invitation letter will receive one or more telephone calls from the study team, after they have had at least 1 week to consider the information. The purpose of these calls will be to answer any questions the patient may have about study participation; ascertain how the team can support the patient to participate should they wish to; identify if there are any requirements for translation and, where necessary, assess capacity to consent to taking part in the study. Research participants do not receive any remuneration or incentive for taking part, but all postal costs are covered. If the patient declines to participate, they will not receive further contact about this study.

### Identification of caregivers

The envelope sent to potential patient participants will contain an information booklet and consent form for people who provide care or support to someone with parkinsonism. The invitation letter asks the person with parkinsonism to pass this information to the person who is their main source of help or support, where relevant. Potential caregiver participants may also be identified from the 'About Me' form, which willing patient participants are asked to return together with their completed consent form. If they tick that they live with someone or that they receive support from family or friends, the patient participant will receive a telephone call to clarify whether this individual is eligible and willing to take part as caregiver.

### Adults lacking capacity to consent to participation in research

Patients will be assumed to have capacity to consent to the study unless there is evidence to suggest otherwise. Situations which will prompt capacity assessment include return of incomplete or partially completed consent forms; an individual (such as care home staff or a family member), who answers the phone on behalf of a patient during a follow-up call, expressing concern that the patient may struggle to understand the study information. If a capacity assessment is triggered, this will be conducted by telephone by a trained member of the team in accordance with the Mental Capacity Act 2005 two-stage test [20]. This individual will take all possible steps to facilitate the potential participant to make a capacitous decision (e.g. by calling back on another occasion; by ensuring that a family member or friend is with the potential participant during the assessment, if possible).

### Identification and involvement of a personal consultee

If the potential participant does not have capacity to give consent to participate in the study, a personal consultee, usually a close family member or friend who knows the potential participant in a personal capacity, will be sought to review the requirements for study participation and offer advice on the

1  
2  
3 wishes and views of the patient, including the patient's view on taking part in research at the time they  
4 had capacity. Personal consultees will be identified from next of kin details held within clinical records,  
5 discussion with care home staff and, where relevant, asking to speak to anyone who lives with or is  
6 supporting the potential patient participant.  
7

8  
9 If the consultee advises that the person would have consented at a time they had capacity, they will be  
10 asked to sign the consultee declaration form. The personal consultee, or another close friend or relative  
11 of the person with parkinsonism, will be asked to complete questionnaires on behalf of the patient,  
12 acting as their "representative." We will not involve nominated consultees such as healthcare  
13 professionals or paid carers. Where no personal consultee is available, for example because the person  
14 lacking capacity has no family member or friend, or they are not willing to act as a personal consultee,  
15 the patient shall be excluded from the study.  
16  
17  
18  
19

## 20 Data collection

### 21 Methods of assessment

22  
23 Recruited participants will complete a single questionnaire booklet at home during the study period and  
24 will be asked to return this to the research team in the pre-paid envelope provided. Where able,  
25 participants will self-complete the questionnaires and can do this over a number of days. Questionnaire  
26 completion can also be facilitated over the telephone or in person to support individuals with, for  
27 example, visual impairment or tremor/dyskinesia limiting ability to write, to participate. Where  
28 participants have capacity but have a physical inability to mark responses on the questionnaire (e.g. due  
29 to tremor or bradykinesia), assistance with making a physical response can be undertaken by another  
30 person, which could include their paid carer, with the answer communicated by the participant.  
31  
32  
33

34 People with parkinsonism, who can consent to the study, will be asked to complete a full patient  
35 questionnaire booklet, which may take up to 2 hours to complete. Representatives of those unable to  
36 consent to the study will complete a specially designed and adapted patient questionnaire booklet on  
37 their behalf; this may take up to 1 hour to complete. Caregivers will be asked to complete the caregiver  
38 questionnaire booklet, about their own perspective, which is estimated to take up to 1 hour to  
39 complete. The contents of all three questionnaire booklets are detailed in table 1.  
40  
41

42 If questionnaire booklets have not been received by the research team within 2 weeks of them being  
43 posted to participants, the research team will telephone the participant to answer any queries and to  
44 offer support. If the participant returns a questionnaire with one or more questions left blank or  
45 incorrectly completed (e.g. multiple options are selected for a question which requires only one  
46 answer), the participant will be contacted by telephone and asked if they are willing to clarify their  
47 answers.  
48  
49  
50  
51  
52  
53  
54  
55  
56  
57  
58  
59  
60

Table 1: Contents of questionnaire booklets

| METRIC                                                                 | DATA                                                                                                   | Items | PPT + | PPT -                | CG  |
|------------------------------------------------------------------------|--------------------------------------------------------------------------------------------------------|-------|-------|----------------------|-----|
| Demographics                                                           | Gender                                                                                                 | 1     | ✓     | ✓                    | ✓   |
|                                                                        | Date of birth                                                                                          | 1     | ✓     | ✓                    | ✓   |
|                                                                        | Ethnicity                                                                                              | 1     | ✓     | ✓                    | ✓   |
|                                                                        | Employment status                                                                                      | 1     | ✓     |                      | ✓   |
|                                                                        | Highest qualification                                                                                  | 1     | ✓     | ✓                    | ✓   |
|                                                                        | Marital status                                                                                         | 1     | ✓     | ✓                    | ✓   |
|                                                                        | Living situation                                                                                       | 1     | ✓     | ✓                    | ✓   |
| Medication                                                             | Medication (name, dose, frequency, route)                                                              | 1     | ✓     |                      |     |
| Parkinson's history                                                    | Diagnosis                                                                                              | 1     | ✓     | ✓                    |     |
|                                                                        | Year of diagnosis                                                                                      | 1     | ✓     | ✓                    |     |
|                                                                        | Laterality of first symptoms                                                                           | 1     | ✓     | ✓                    |     |
|                                                                        | Advanced therapies                                                                                     | 3     | ✓     | ✓                    |     |
| General medical history                                                | Past medical history                                                                                   | 1     | ✓     | ✓                    |     |
|                                                                        | Healthcare contacts                                                                                    | 2     | ✓     | ✓                    |     |
|                                                                        | Falls and near falls                                                                                   | 2     | ✓     | ✓                    |     |
|                                                                        | Height, weight, weight 3-6 months ago                                                                  | 3     | ✓     | ✓                    | ✓   |
|                                                                        | Health status question                                                                                 | 1     |       |                      | ✓   |
| About the care                                                         | Relationship to recipient                                                                              | 1     |       |                      | ✓   |
|                                                                        | Living with recipient                                                                                  | 1     |       |                      | ✓   |
|                                                                        | Intensity of caring and tasks of caring                                                                | 2     |       |                      | ✓   |
|                                                                        | Duration of caring                                                                                     | 1     |       |                      | ✓   |
| Information about care recipient (if the patient is not participating) | Gender                                                                                                 | 1     |       |                      | (✓) |
|                                                                        | Age                                                                                                    | 1     |       |                      | (✓) |
|                                                                        | Living situation                                                                                       | 1     |       |                      | (✓) |
|                                                                        | Diagnosis                                                                                              | 1     |       |                      | (✓) |
|                                                                        | Year of diagnosis                                                                                      | 1     |       |                      | (✓) |
| Nutritional risk                                                       | Seniors in the community: Risk Evaluation for Eating and Nutrition (SCREEN II)-14 item version [21-23] | 17    | ✓     | ✓                    | ✓   |
| Frailty                                                                | Survey of Health, Ageing and Retirement in Europe (SHARE-FI) 75+ [24]                                  | 5     | ✓     | ✓                    | ✓   |
| Sarcopenia screen                                                      | SARC-F questionnaire [25]                                                                              | 5     | ✓     | ✓                    | ✓   |
| Covid-19 questions                                                     | Symptoms, self-isolation/shielding, access to care                                                     | 13    | ✓     | ✓                    | ✓   |
| Lifestyle                                                              | Smoking                                                                                                | 1     | ✓     | ✓                    |     |
|                                                                        | Alcohol intake                                                                                         | 2     | ✓     | ✓                    |     |
|                                                                        | Physical activity                                                                                      | 3     | ✓     | ✓                    |     |
| Capability/wellbeing                                                   | ICEpop CAPability measure for Older People [26]                                                        | 5     | ✓     | ✓<br>(proxy version) |     |
| Quality of life                                                        | Parkinson's Disease Questionnaire-39 (PDQ-39) [27]                                                     | 39    | ✓     |                      |     |
| Non-motor symptom burden                                               | Non-Motor Symptom Questionnaire (NMSQ) [28]                                                            | 30    | ✓     |                      |     |
| Autonomic symptoms                                                     | Scales for Outcomes in Parkinson's disease- autonomic dysfunction (SCOPA-AUT) [29]                     | 25    | ✓     |                      |     |
| Depression                                                             | Beck depression inventory-II (BDI-II) [30]                                                             | 21    | ✓     |                      |     |

|                             |                                                                                                                |                                                                                                                      |   |   |   |
|-----------------------------|----------------------------------------------------------------------------------------------------------------|----------------------------------------------------------------------------------------------------------------------|---|---|---|
| Bowel function              | Neurogenic bowel dysfunction score [31]                                                                        | 11                                                                                                                   | ✓ |   |   |
| Urinary tract symptoms      | International Consultation on Incontinence Questionnaire: ICIQ-mLUTS (for men) and ICIQ-fLUTS (for women) [32] | 12 (female)<br>13 (male)                                                                                             | ✓ |   |   |
| Cognition                   | Test Your Memory [33]                                                                                          | 16                                                                                                                   | ✓ |   |   |
| Motor symptom burden        | Motor rating scale- adapted from Parveen [34]                                                                  | 4                                                                                                                    | ✓ |   |   |
| Freezing of gait            | New Freezing of Gait (N-FOG) [35]                                                                              | 9                                                                                                                    | ✓ |   |   |
| Patient activation          | Patient Activation Measure [36]                                                                                | 13                                                                                                                   | ✓ |   |   |
| Symptoms and behaviour      | Neuropsychiatric Inventory [37]                                                                                | 12                                                                                                                   |   | ✓ |   |
| Activities of daily living  | Bristol Activities of Daily Living Scale [38]                                                                  | 20                                                                                                                   |   | ✓ |   |
| Quality of life             | Parkinson's Disease Questionnaire (PDQ) carer [39]                                                             | 29                                                                                                                   |   |   | ✓ |
| Caregiver burden            | Zarit Burden Interview [40]                                                                                    | 22                                                                                                                   |   |   | ✓ |
| Caregiver activation        | Caregiver PAM                                                                                                  | 13                                                                                                                   |   |   | ✓ |
| Caregiver coping strategies | Brief Coping Orientation to Problems Experienced (BriefCOPE) [41]                                              | 28                                                                                                                   |   |   | ✓ |
| Perceived social support    | Multidimensional scale of perceived social support [42]                                                        | 12                                                                                                                   |   |   | ✓ |
| PPT +                       |                                                                                                                | Participant with parkinsonism with capacity to consent to research                                                   |   |   |   |
| PPT-                        |                                                                                                                | Participant with parkinsonism without capacity to consent to research (questionnaires completed by a representative) |   |   |   |
| CG                          |                                                                                                                | Caregiver participant                                                                                                |   |   |   |

## Rationale for selected questionnaires

### *Measures for people with parkinsonism*

In order to capture the other comorbidities affecting people with parkinsonism, we are using a list designed as a research tool for the self-report of chronic conditions in primary care [43].

The 39-item Parkinson's Disease Questionnaire (PDQ-39) is a Movement Disorder Society-recommended, PD-specific measure of health-related quality of life and has been well-validated and utilised in this population [44]. A well-being measure, ICECAP-O will be used to capture the broader impact of PD on participants. ICECAP-O is a relatively new measure of capability in older people which has been previously used in patients with PD [45]. A proxy version has been used to assess capability in older adults with cognitive impairment [46, 47] so this measure will be completed by a representative for patients lacking capacity and unable to complete questionnaires.

Non-motor symptoms can be particularly troubling for patients and can negatively influence quality of life [48] and so are important to capture as part of this holistic and in-depth assessment. Whilst the Parkinson's Disease Nonmotor Symptoms Questionnaire (NMSQ) is a screening tool, rather than a rating

1  
2  
3 instrument, it was selected for this study because it does not require rater administration and is  
4 relatively quick for participants to self-complete [49]. The Beck Depression Inventory (BDI-II) has been  
5 validated for use in people with PD and is widely used to screen for depression and assess the severity of  
6 depression symptoms in the group [50].  
7

8  
9 The SCOPA AUT questionnaire has been included to characterise the burden of autonomic symptoms  
10 that are responsible for many non-motor symptoms. These can be diffuse and wide-reaching and  
11 include important yet seldom considered issues such as sexual function, as well common phenomena  
12 including orthostatic hypotension. Bladder symptoms contribute significantly to quality of life and will  
13 be further explored in more depth using the International Consultation on Incontinence Questionnaire  
14 male and female short form Lower Urinary Tract tools (mLUTS and fLUTS), which have been  
15 recommended for use in PD [32]. These broadly cover all urinary symptoms specific to each gender.  
16 Bowel symptoms will be similarly explored using the neurogenic bowel score [31].  
17  
18

19 Test Your Memory (TYM) is a self-administered cognitive screening test [51] which has been used  
20 amongst people with PD and compared to the Montreal Cognitive Assessment (MoCA) [33].  
21

22 Self-reported motor symptoms will be captured using questions adapted from a motor rating form  
23 based on motor tasks from the Movement Disorder Society-Unified Parkinson's Disease Rating Scale  
24 (MDS-UPDRS) [34].  
25

26 Freezing of gait is a common symptom, particularly in the advanced phases of PD, which can cause  
27 disability, negatively impact quality of life [52] and increase falls risk [53]. The New-Freezing of Gait  
28 Questionnaire (NFOG-Q) is a self-reported tool to assess the impact and severity of freezing symptoms  
29 [35].  
30  
31

32 The Patient Activation Measure is a metric used to quantify the self-management capabilities of patients  
33 [54]. There is an increasing awareness that patients who have the knowledge, skills, and confidence to  
34 look after their health and feel empowered to do so have better health outcomes [54] and so it is  
35 important to gain an understanding of activation levels amongst people with PD and their caregivers.  
36

37 The Bristol Activities of Daily Living (Bristol ADL) has been shown to have good content and construct  
38 validity when used with people with dementia [38] and was one of only two scales rated as moderate  
39 quality in a systematic review of Activities of Daily Living scales in dementia and, of these, the only one  
40 suitable for self-completion by a caregiver [55]. This will allow the quantification of functional ability in  
41 participants who take part with a representative. Neuropsychiatric symptoms are a common feature of  
42 PD dementia and can negatively impact caregiver burden [56], hence particularly important to measure  
43 for participants with cognitive impairment. The questionnaire form of the Neuropsychiatric Inventory  
44 (NPI-Q) is a brief proxy-completed assessment [57].  
45  
46

47 Measures which have not been validated for proxy report, or for which it would not be feasible for  
48 someone to complete on behalf of the patient, have not been included in the shorter patient  
49 questionnaire booklet for completion by a representative.  
50  
51  
52  
53  
54  
55  
56  
57  
58  
59  
60

### *Measures for caregivers*

Several tools will be used to measure caregiver burden and experience. The number of hours spent caregiving will be captured using a grid which allows the caregiver to document the hours spent on each of four categories of tasks, which are based on the categories included within the Caregiver Indirect and Informal Care Cost Assessment Questionnaire, developed by Landfeldt and colleagues [58]. Caregivers can report the hours spent on each day of the week to account for the fact that their input may differ throughout the week.

The 21-item Zarit Burden Inventory is the most commonly used measure of caregiver burden amongst family caregivers of people with PD [59]. The Parkinson's Disease Questionnaire (PDQ) carer has been specifically designed to measure quality of life amongst caregivers of people with PD [39] and will be used in this study.

The BriefCOPE is a frequently used coping scale and its subscales have been shown to predict distress and wellbeing [60]. The Multidimensional Scale of Perceived Social Support is a subjective assessment of social support [42]. Coping style may alter the way an informal caregiver deals with the challenges and stresses of caring and a caregiver's perception that they have good social support may have a protective effect [59].

### *Measures used in all three groups*

There is evidence to suggest that people with PD are at risk of weight loss and malnutrition [61]. Moreover, malnutrition is prevalent in older adults and is responsible for many significant health-related negative outcomes [62-64]. We will quantify nutrition risk using the Seniors in the community: risk evaluation for eating and nutrition, Version II (SCREEN-II) scale which is a valid and reliable tool to measure nutritional status.

Frailty is a syndrome of loss of physiological reserve which confers greater vulnerability to negative health outcomes; it is considered to be a dynamic condition in which individuals may transition to an improved, as well as more advanced, frailty state [65]. The Frailty Instrument for Primary Care of the Survey of Health, Ageing and Retirement in Europe (SHARE) is a phenotypic frailty assessment tool; in this study, we have opted to use the SHARE tool which was developed and validated in those aged 75 years and over, in which assessment of handgrip strength was substituted with a question about walking [24]. In the SHARE cohort, walking was assessed by a clinician; in this study, we have adapted the SHARE-FI75+ for self-reported completion. Sarcopenia, a disease characterised by low muscle strength, together with low muscle quantity or quality, may contribute to the development of physical frailty [66]. SARC-F is a rapid screening tool for sarcopenia [25] which will be used.

Caregivers are often older adults [9] and may themselves be living with frailty, sarcopenia and risk of malnutrition, hence the SARC-F, SHARE-FI75+ and SCREEN-II questionnaires will also be included in the caregiver questionnaire booklet, as well as the patient and representative-completed booklets.

In order to contextualise the responses to other questionnaires collected in this study, we have compiled some questions to gather information about any symptoms of Covid-19 infection experienced by participants, whether they have had to self-isolate or shield, and their experience of accessing care during the pandemic.



## Sample size

The sample size is pragmatic based on the total available number of potentially eligible people with parkinsonism at this single centre. There are approximately 1,200 people with parkinsonism who are within the geographical catchment of the RUH Bath. The likely response rate is unclear but we anticipate we will achieve a response rate of over 40% which would result in 480 completed patient questionnaires.

A previous cross-sectional postal survey, with a response rate of 58.2%, noted a mean Parkinson's Disease Questionnaire-39 (PDQ-39) summary index score of 44.6 (SD 17.6) [67]. With a sample size of 480 we can estimate a mean PDQ-39 score with the following precision of approximately +/- 3.3 points. This 95% confidence interval range is sufficiently precise for descriptive purposes. Further sub-groups e.g., by age group and gender will be less precise.

## Statistical analysis

Results will be displayed as descriptive statistics using mean plus standard deviation for normally distributed variables and median plus interquartile range for skewed variables. Multivariable linear and logistic regression models will be used to test simple associations. Our a priori hypotheses are that we will show worse health needs and greater disability with increasing age, disease duration and gender. Other variables of interest include socioeconomic status, geography (urban-rural), and ethnicity (though we have limited numbers of ethnic minorities in this catchment area so will be underpowered). We are specifically interested to test how these factors could potentially interact with each, using goodness of fit or likelihood ratio tests. We will also examine if other covariates such as multi-morbidity could act as potential mediators. For example, men with similar disease duration may have greater disability partially due to a greater burden of cardio-respiratory disease. Since these are exploratory subgroup analyses, we are cognisant of the potential for type 1 error due to multiple testing.

Where possible, we will follow the recommendation of the questionnaires' authors for how to deal with missing questionnaire responses, for example pro rating the score, where appropriate. We will explore which factors predict the missing variables and then use multiple imputation methods, assuming these are "missing at random" to combine the effects over 10 simulated datasets and incorporating uncertainty using Rubin's rules. This will allow us to conduct a sensitivity analysis to compare the complete case with the imputed results.

## Limitations

Despite our efforts to reduce barriers to participation, in order to recruit a representative sample of people with parkinsonism, there will inevitably be some non-response bias. We also acknowledge that the region around RUH Bath is not ethnically diverse. Additionally, some recruited participants may not complete and return all questionnaires, although we aim to minimise missing data by following up any queries by telephone. Finally, this study only assesses symptomatology using questionnaire-based measures; there would be benefit to triangulating these self-reported measures with digital measures in the future.

## Patient and public involvement statement

This study has been designed and performed in conjunction with the study public involvement advisory group (PIAG), all of whom have PD. The PIAG been critical to the design and content of participant information leaflets and consent forms. Changes made as a result of their valuable contribution include:

- Improved sensitivity around terminology for those who care for someone with PD, acknowledging that they may live with someone who has PD but not see themselves as a carer/caregiver, but may 'provide support'. The term 'caregiver' was preferred over 'carer' and therefore used throughout the study documentation.
- Inclusion of an approximate time to complete the questionnaires in the participant information leaflet and we further emphasised that the questionnaires are intended to be completed at home
- Inclusion of information for plans regarding dissemination of results to participants.

## Ethics and dissemination

This protocol was approved by the London - Brighton & Sussex Research Ethics Committee on 27 July 2020 (REC reference 20/LO/0890). It is registered with the ISRCTN (11452969).

All participants will either provide written informed consent or, in the case of patient participants who lack capacity to consent to participation in the study, a consultee will provide advice on their prior wishes and will sign a consultee declaration if they believe the patient would be willing to participate.

If the person with parkinsonism has opted not to participate themselves, it is necessary, so far as possible, for us to collect some basic information about who the caregiver supports. In this case, the person with PD (or their personal consultee if they lack capacity to make decisions about the study) is asked to sign a section on the back of the caregiver consent form if they are happy for their caregiver to provide basic information about them.

Participants can choose to withdraw for any reason at any time during their involvement in the study and will not be followed up after withdrawal from the study. They will be asked their reason for withdrawal but do not have to provide this. Data collected up to the time of withdrawal will be used.

We plan to publish the results of this protocol in an international peer-reviewed journal and at academic national and international meetings and conferences. When we share the results of key findings, we will upload a lay summary to the PRIME-Parkinson website.

## Authors' contributions

ET, FEL, YBS and EJH were responsible for the concept of the study and contributed to study development and design. ET, DEB and MDS contributed to patient recruitment. ET drafted the manuscript and all authors provided critical revision and approved the final protocol.

## Funding statement

This work was supported by the Gatsby Charitable Foundation, grant number 3676.

## Data statement

Access to the data will be available through application to the Chief Investigator. Pseudo-anonymised data may be shared with other researchers to enable meta-analyses.

## Competing Interests Statement

EJH received funding from the National Institute of Health Technology (NIHR), the Gatsby Foundation and Parkinson's UK; received fees for speaking and consultancy from Profile pharma Medicys and Luye; and received travel support from Bial Abbvie and Ever pharma.

YBS is a recipient of a Radboud Excellence award. He has received research support from the UK Medical Research Council, Wellcome Trust, NIHR, Parkinson's UK, Versus Arthritis, Gatsby Foundation, Dunhill Trust, and received a Radboud Excellence Award.

All other authors declare that they have no competing interests.

## Acknowledgements

None

## References

1. de Lau LM, Breteler MM. Epidemiology of Parkinson's disease. *Lancet Neurol*. 2006;5(6):525-35. <doi:<10.1016/S1474-4422(06)70471-9>
2. Pringsheim T, Jette N, Frolkis A, Steeves TDL. The prevalence of Parkinson's disease: a systematic review and meta-analysis. *Movement Disorders*.29(13):1583-90. <
3. Ryden LE, Lewis SJG. Parkinson's Disease in the Era of Personalised Medicine: One Size Does Not Fit All. *Drugs Aging*. 2019;36(2):103-13. <doi:<10.1007/s40266-018-0624-5>
4. Schapira AHV, Chaudhuri KR, Jenner P. Non-motor features of Parkinson disease. *Nat Rev Neurosci*. 2017;18(8):509. <doi:<10.1038/nrn.2017.91>
5. Shippee ND, Shah ND, May CR, Mair FS, Montori VM. Cumulative complexity: a functional, patient-centered model of patient complexity can improve research and practice. *J Clin Epidemiol*. 2012;65(10):1041-51. <doi:<10.1016/j.jclinepi.2012.05.005>

- 1  
2  
3  
4 6. Cesari M, Perez-Zepeda MU, Marzetti E. Frailty and Multimorbidity: Different Ways of  
5 Thinking About Geriatrics. *J Am Med Dir Assoc.* 2017;18(4):361-4. <  
6 >doi:<10.1016/j.jamda.2016.12.086>  
7
- 8 7. Greenwell K, Gray WK, van Wersch A, van Schaik P, Walker R. Predictors of the  
9 psychosocial impact of being a carer of people living with Parkinson's disease: a systematic  
10 review. *Parkinsonism & Related Disorders.* 2015;21(1):1-11. <  
11 >doi:<10.1016/j.parkreldis.2014.10.013>  
12
- 13 8. Hand A, Oates LL, Gray WK, Walker RW. Understanding the Care Needs and Profile of  
14 People Living at Home With Moderate to Advanced Stage Parkinson Disease. *Journal of*  
15 *Geriatric Psychiatry & Neurology.*31(5):237-47. <  
16
- 17 9. Hand A, Oates LL, Gray WK, Walker RW. The role and profile of the informal carer in  
18 meeting the needs of people with advancing Parkinson's disease. *Aging Ment Health.*  
19 2019;23(3):337-44. < >doi:<10.1080/13607863.2017.1421612>  
20
- 21 10. Santos-Garcia D, de Deus Fonticoba T, Suarez Castro E, Aneiros Diaz A, McAfee D,  
22 Catalan MJ, et al. Non-motor symptom burden is strongly correlated to motor complications in  
23 patients with Parkinson's disease. *Eur J Neurol.* 2020;27(7):1210-23. <  
24 >doi:<10.1111/ene.14221>  
25
- 26 11. van Wamelen DJ, Sauerbier A, Leta V, Rodriguez-Blazquez C, Falup-Pecurariu C,  
27 Rodriguez-Violante M, et al. Cross-sectional analysis of the Parkinson's disease Non-motor  
28 International Longitudinal Study baseline non-motor characteristics, geographical distribution  
29 and impact on quality of life. *Sci Rep.* 2021;11(1):9611. < >doi:<10.1038/s41598-021-88651-4>  
30
- 31 12. Szewczyk-Krolikowski K, Tomlinson P, Nithi K, Wade-Martins R, Talbot K, Ben-Shlomo  
32 Y, et al. The influence of age and gender on motor and non-motor features of early Parkinson's  
33 disease: initial findings from the Oxford Parkinson Disease Center (OPDC) discovery cohort.  
34 *Parkinsonism Relat Disord.* 2014;20(1):99-105. < >doi:<10.1016/j.parkreldis.2013.09.025>  
35
- 36 13. Malek N, Swallow DM, Grosset KA, Lawton MA, Marrinan SL, Lehn AC, et al. Tracking  
37 Parkinson's: Study Design and Baseline Patient Data. *J Parkinsons Dis.* 2015;5(4):947-59. <  
38 >doi:<10.3233/JPD-150662>  
39
- 40 14. Sturchio A, Marsili L, Vizcarra JA, Dwivedi AK, Kauffman MA, Duker AP, et al.  
41 Phenotype-Agnostic Molecular Subtyping of Neurodegenerative Disorders: The Cincinnati  
42 Cohort Biomarker Program (CCBP). *Front Aging Neurosci.* 2020;12:553635. <  
43 >doi:<10.3389/fnagi.2020.553635>  
44  
45  
46  
47  
48  
49  
50  
51  
52  
53  
54  
55  
56  
57  
58  
59  
60

- 1  
2  
3  
4 15. Weerkamp NJ, Tissingh G, Poels PJ, Zuidema SU, Munneke M, Koopmans RT, et al.  
5 Nonmotor symptoms in nursing home residents with Parkinson's disease: prevalence and effect  
6 on quality of life. *J Am Geriatr Soc.* 2013;61(10):1714-21. < >doi:<10.1111/jgs.12458>  
7
- 8  
9 16. Fasano A, Fung VSC, Lopiano L, Elibol B, Smolentseva IG, Seppi K, et al.  
10 Characterizing advanced Parkinson's disease: OBSERVE-PD observational study results of  
11 2615 patients. *BMC Neurol.* 2019;19(1):50. < >doi:<10.1186/s12883-019-1276-8>  
12
- 13 17. Chaudhuri KR, Odin P, Antonini A, Martinez-Martin P. Parkinson's disease: the non-  
14 motor issues. *Parkinsonism Relat Disord.* 2011;17(10):717-23. <  
15 >doi:<10.1016/j.parkreldis.2011.02.018>  
16
- 17 18. Tenison E, Smink A, Redwood S, Darweesh S, Cottle H, van Halteren A, et al. Proactive  
18 and Integrated Management and Empowerment in Parkinson's Disease: Designing a New  
19 Model of Care. *Parkinsons Dis.* 2020;2020:8673087. < >doi:<10.1155/2020/8673087>  
20
- 21 19. Proactive and Integrated Management and Empowerment in Parkinson's Disease  
22 (PRIME-UK): A New Model of Care (PRIME-RCT) (PRIME-RCT; NCT05127057)  
23 ClinicalTrials.gov2021 [updated 13/12/2021. Available from:  
24 <https://www.clinicaltrials.gov/ct2/show/NCT05127057?term=NCT05127057&cond=Parkinson+Di>  
25 [sease&draw=2&rank=1.](https://www.clinicaltrials.gov/ct2/show/NCT05127057?term=NCT05127057&cond=Parkinson+Di)  
26
- 27 20. Mental Capacity Act 2005- Code of Practice. 2007.  
28
- 29 21. Keller HH, Goy R, Kane SL. Validity and reliability of SCREEN II (Seniors in the  
30 community: risk evaluation for eating and nutrition, Version II). *Eur J Clin Nutr.*  
31 2005;59(10):1149-57. < >doi:<10.1038/sj.ejcn.1602225>  
32
- 33 22. Keller HH, McKenzie JD, Goy RE. Construct validation and test-retest reliability of the  
34 seniors in the community: risk evaluation for eating and nutrition questionnaire. *J Gerontol A*  
35 *Biol Sci Med Sci.* 2001;56(9):M552-8. < >doi:<10.1093/gerona/56.9.m552>  
36
- 37 23. Wham CA, Redwood KM, Kerse N. Validation of the nutrition screening tool 'Seniors in  
38 the Community: Risk Evaluation for Eating and Nutrition, version II' among octogenarians. *J*  
39 *Nutr Health Aging.* 2014;18(1):39-43. < >doi:<10.1007/s12603-013-0361-8>  
40
- 41 24. Romero-Ortuno R, Soraghan C. A Frailty Instrument for primary care for those aged 75  
42 years or more: findings from the Survey of Health, Ageing and Retirement in Europe, a  
43 longitudinal population-based cohort study (SHARE-FI75+). *BMJ Open.* 2014;4(12):e006645. <  
44 >doi:<10.1136/bmjopen-2014-006645>  
45
- 46 25. Malmstrom TK, Morley JE. SARC-F: a simple questionnaire to rapidly diagnose  
47 sarcopenia. *J Am Med Dir Assoc.* 2013;14(8):531-2. < >doi:<10.1016/j.jamda.2013.05.018>  
48  
49  
50  
51  
52  
53  
54  
55  
56  
57  
58  
59  
60

- 1  
2  
3  
4 26. Coast J, Flynn TN, Natarajan L, Sproston K, Lewis J, Louviere JJ, et al. Valuing the  
5 ICECAP capability index for older people. *Soc Sci Med*. 2008;67(5):874-82. <  
6 >doi:<10.1016/j.socscimed.2008.05.015>  
7
- 8 27. Peto V, Jenkinson C, Fitzpatrick R, Greenhall R. The development and validation of a  
9 short measure of functioning and well being for individuals with Parkinson's disease. *Qual Life*  
10 *Res*. 1995;4(3):241-8. <  
11  
12
- 13 28. Martinez-Martin P, Schapira AH, Stocchi F, Sethi K, Odin P, MacPhee G, et al.  
14 Prevalence of nonmotor symptoms in Parkinson's disease in an international setting; study  
15 using nonmotor symptoms questionnaire in 545 patients. *Mov Disord*. 2007;22(11):1623-9. <  
16 >doi:<10.1002/mds.21586>  
17
- 18 29. Visser M, Marinus J, Stiggelbout AM, Van Hilten JJ. Assessment of autonomic  
19 dysfunction in Parkinson's disease: the SCOPA-AUT. *Mov Disord*. 2004;19(11):1306-12. <  
20 >doi:<10.1002/mds.20153>  
21
- 22 30. BECK AT, WARD CH, MENDELSON M, MOCK J, ERBAUGH J. An inventory for  
23 measuring depression. *Arch Gen Psychiatry*. 1961;4:561-71. <  
24 >doi:<10.1001/archpsyc.1961.01710120031004>  
25
- 26 31. Krogh K, Christensen P, Sabroe S, Laurberg S. Neurogenic bowel dysfunction score.  
27 *Spinal Cord*. 2006;44(10):625-31. < >doi:<10.1038/sj.sc.3101887>  
28
- 29 32. Pavy-Le Traon A, Cotterill N, Amarenco G, Duerr S, Kaufmann H, Lahrmann H, et al.  
30 Clinical Rating Scales for Urinary Symptoms in Parkinson Disease: Critique and  
31 Recommendations. *Mov Disord Clin Pract*. 2018;5(5):479-91. < >doi:<10.1002/mdc3.12636>  
32
- 33 33. Henderson EJ, Chu H, Gaunt DM, Whone AL, Ben-Shlomo Y, Lyell V. Comparison of  
34 Test Your Memory and Montreal Cognitive Assessment Measures in Parkinson's Disease.  
35 *Parkinsons Dis*. 2016;2016:1012847. < >doi:<10.1155/2016/1012847>  
36
- 37 34. Parveen S. Comparison of self and proxy ratings for motor performance of individuals  
38 with Parkinson disease. *Brain Cognition*. 2016;103:62-9. < >doi:<10.1016/j.bandc.2016.01.006>  
39
- 40 35. Nieuwboer A, Rochester L, Herman T, Vandenberghe W, Emil GE, Thomaes T, et al.  
41 Reliability of the new freezing of gait questionnaire: Agreement between patients with  
42 Parkinson's disease and their carers. *Gait Posture*. 2009;30(4):459-63. <  
43 >doi:<10.1016/j.gaitpost.2009.07.108>  
44
- 45 36. Hibbard JH, Mahoney ER, Stockard J, Tusler M. Development and testing of a short  
46 form of the patient activation measure. *Health Serv Res*. 2005;40(6):1918-30. <  
47 >doi:<10.1111/j.1475-6773.2005.00438.x>  
48  
49  
50  
51  
52  
53  
54  
55  
56  
57  
58  
59  
60

- 1  
2  
3  
4 37. Cummings JL, Mega M, Gray K, Rosenberg-Thompson S, Carusi DA, Gornbein J. The  
5 Neuropsychiatric Inventory: comprehensive assessment of psychopathology in dementia.  
6 Neurology. 1994;44(12):2308-14. < >doi:<10.1212/wnl.44.12.2308>  
7  
8 38. Bucks RS, Ashworth DL, Wilcock GK, Siegfried K. Assessment of activities of daily living  
9 in dementia: Development of the Bristol activities of daily living scale. Age and Ageing.  
10 1996;25(2):113-20. < >doi:<DOI 10.1093/ageing/25.2.113>  
11  
12 39. Jenkinson C, Dummett S, Kelly L, Peters M, Dawson J, Morley D, et al. The  
13 development and validation of a quality of life measure for the carers of people with Parkinson's  
14 disease (the PDQ-Carer). Parkinsonism Relat Disord. 2012;18(5):483-7. <  
15 >doi:<10.1016/j.parkreldis.2012.01.007>  
16  
17 40. Zarit SH, Reever KE, Bachpeterson J. Relatives of the Impaired Elderly - Correlates of  
18 Feelings of Burden. Gerontologist. 1980;20(6):649-55. < >doi:<DOI 10.1093/geront/20.6.649>  
19  
20 41. Carver CS. You want to measure coping but your protocol's too long: consider the brief  
21 COPE. Int J Behav Med. 1997;4(1):92-100. < >doi:<10.1207/s15327558ijbm0401\_6>  
22  
23 42. Zimet GD, Powell SS, Farley GK, Werkman S, Berkoff KA. Psychometric Characteristics  
24 of the Multidimensional Scale of Perceived Social Support. J Pers Assess. 1990;55(3-4):610-7.  
25 < >doi:<DOI 10.1207/s15327752jpa5503&4\_17>  
26  
27 43. Fortin M, Almirall J, Nicholson K. Development of a research tool to document self-  
28 reported chronic conditions in primary care. J Comorb. 2017;7(1):117-23. <  
29 >doi:<10.15256/joc.2017.7.122>  
30  
31 44. Martinez-Martin P, Jeukens-Visser M, Lyons KE, Rodriguez-Blazquez C, Selai C,  
32 Siderowf A, et al. Health-related quality-of-life scales in Parkinson's disease: critique and  
33 recommendations. Mov Disord. 2011;26(13):2371-80. < >doi:<10.1002/mds.23834>  
34  
35 45. Xin Y, Lewsey J, Gray R, Clarke CE, McIntosh E. Broadening the evaluative scope of  
36 quality of life in Parkinson's: Testing the construct validity of the ICECAP-O instrument  
37 [abstract]. International Parkinson's Disease and Movement Disorder Society Meeting  
38 abstracts Mov Disord.; 2016.  
39  
40 46. Makai P, Brouwer WB, Koopmanschap MA, Nieboer AP. Capabilities and quality of life  
41 in Dutch psycho-geriatric nursing homes: an exploratory study using a proxy version of the  
42 ICECAP-O. Qual Life Res. 2012;21(5):801-12. < >doi:<10.1007/s11136-011-9997-1>  
43  
44 47. Makai P, Beckebans F, van Exel J, Brouwer WB. Quality of life of nursing home  
45 residents with dementia: validation of the German version of the ICECAP-O. PLoS One.  
46 2014;9(3):e92016. < >doi:<10.1371/journal.pone.0092016>  
47  
48  
49  
50  
51  
52  
53  
54  
55  
56  
57  
58  
59  
60

- 1  
2  
3  
4 48. Chaudhuri KR, Schrag A, Weintraub D, Rizos A, Rodriguez-Blazquez C, Mamikonyan E,  
5 et al. The Movement Disorder Society Nonmotor Rating Scale: Initial Validation Study. *Mov*  
6 *Disord*. 2019. <doi:<10.1002/mds.27862>  
7  
8 49. Chaudhuri KR, Martinez-Martin P, Schapira AH, Stocchi F, Sethi K, Odin P, et al.  
9 International multicenter pilot study of the first comprehensive self-completed nonmotor  
10 symptoms questionnaire for Parkinson's disease: the NMSQuest study. *Mov Disord*.  
11 2006;21(7):916-23. <doi:<10.1002/mds.20844>  
12  
13 50. Schrag A, Barone P, Brown RG, Leentjens AF, McDonald WM, Starkstein S, et al.  
14 Depression rating scales in Parkinson's disease: critique and recommendations. *Mov Disord*.  
15 2007;22(8):1077-92. <doi:<10.1002/mds.21333>  
16  
17 51. Brown J, Pengas G, Dawson K, Brown LA, Clatworthy P. Self administered cognitive  
18 screening test (TYM) for detection of Alzheimer's disease: cross sectional study. *BMJ*.  
19 2009;338:b2030. <doi:<10.1136/bmj.b2030>  
20  
21 52. Moore O, Peretz C, Giladi N. Freezing of gait affects quality of life of peoples with  
22 Parkinson's disease beyond its relationships with mobility and gait. *Mov Disord*.  
23 2007;22(15):2192-5. <doi:<10.1002/mds.21659>  
24  
25 53. Lim I, van Wegen E, Jones D, Rochester L, Nieuwboer A, Willems AM, et al. Identifying  
26 fallers with Parkinson's disease using home-based tests: who is at risk? *Mov Disord*.  
27 2008;23(16):2411-5. <doi:<10.1002/mds.22209>  
28  
29 54. Greene J, Hibbard JH, Sacks R, Overton V, Parrotta CD. When patient activation levels  
30 change, health outcomes and costs change, too. *Health Aff (Millwood)*. 2015;34(3):431-7. <  
31 >doi:<10.1377/hlthaff.2014.0452>  
32  
33 55. Sikkes SA, de Lange-de Klerk ES, Pijnenburg YA, Scheltens P, Uitdehaag BM. A  
34 systematic review of Instrumental Activities of Daily Living scales in dementia: room for  
35 improvement. *J Neurol Neurosurg Psychiatry*. 2009;80(1):7-12. <  
36 >doi:<10.1136/jnnp.2008.155838>  
37  
38 56. Martinez-Martin P, Rodriguez-Blazquez C, Forjaz MJ, Frades-Payo B, Aguera-Ortiz L,  
39 Weintraub D, et al. Neuropsychiatric symptoms and caregiver's burden in Parkinson's disease.  
40 *Parkinsonism Relat Disord*. 2015;21(6):629-34. <doi:<10.1016/j.parkreldis.2015.03.024>  
41  
42 57. Kaufer DI, Cummings JL, Ketchel P, Smith V, MacMillan A, Shelley T, et al. Validation of  
43 the NPI-Q, a brief clinical form of the Neuropsychiatric Inventory. *J Neuropsychiatry Clin*  
44 *Neurosci*. 2000;12(2):233-9. <doi:<10.1176/jnp.12.2.233>  
45  
46  
47  
48  
49  
50  
51  
52  
53  
54  
55  
56  
57  
58  
59  
60



- 1  
2  
3  
4 58. Landfeldt E, Zethraeus N, Lindgren P. Standardized Questionnaire for the Measurement,  
5 Valuation, and Estimation of Costs of Informal Care Based on the Opportunity Cost and Proxy  
6 Good Method. *Appl Health Econ Health Policy*. 2019;17(1):15-24. < >doi:<10.1007/s40258-018-  
7 0418-2>  
8  
9  
10 59. Mosley PE, Moodie R, Dissanayaka N. Caregiver Burden in Parkinson Disease: A  
11 Critical Review of Recent Literature. *J Geriatr Psychiatry Neurol*. 2017;30(5):235-52. <  
12 >doi:<10.1177/0891988717720302>  
13  
14 60. Kato T. Frequently Used Coping Scales: A Meta-Analysis. *Stress Health*.  
15 2015;31(4):315-23. < >doi:<10.1002/smi.2557>  
16  
17 61. van der Marck MA, Dicke HC, Uc EY, Kentin ZH, Borm GF, Bloem BR, et al. Body mass  
18 index in Parkinson's disease: a meta-analysis. *Parkinsonism Relat Disord*. 2012;18(3):263-7. <  
19 >doi:<10.1016/j.parkreldis.2011.10.016>  
20  
21 62. Rullier L, Lagarde A, Bouisson J, Bergua V, Torres M, Barberger-Gateau P.  
22 Psychosocial correlates of nutritional status of family caregivers of persons with dementia. *Int*  
23 *Psychogeriatr*. 2014;26(1):105-13. < >doi:<10.1017/S1041610213001579>  
24  
25 63. Margetts BM, Thompson RL, Elia M, Jackson AA. Prevalence of risk of undernutrition is  
26 associated with poor health status in older people in the UK. *Eur J Clin Nutr*. 2003;57(1):69-74.  
27 < >doi:<10.1038/sj.ejcn.1601499>  
28  
29 64. Volkert D, Beck AM, Cederholm T, Cereda E, Cruz-Jentoft A, Goisser S, et al.  
30 Management of Malnutrition in Older Patients-Current Approaches, Evidence and Open  
31 Questions. *J Clin Med*. 2019;8(7). < >doi:<10.3390/jcm8070974>  
32  
33 65. Hoogendijk EO, Afilalo J, Ensrud KE, Kowal P, Onder G, Fried LP. Frailty: implications  
34 for clinical practice and public health. *Lancet*. 2019;394(10206):1365-75. <  
35 >doi:<10.1016/S0140-6736(19)31786-6>  
36  
37 66. Cruz-Jentoft AJ, Baeyens JP, Bauer JM, Boirie Y, Cederholm T, Landi F, et al.  
38 Sarcopenia: European consensus on definition and diagnosis: Report of the European Working  
39 Group on Sarcopenia in Older People. *Age Ageing*. 2010;39(4):412-23. <  
40 >doi:<10.1093/ageing/afq034>  
41  
42 67. Jenkinson C, Fitzpatrick R, Peto V, Greenhall R, Hyman N. The Parkinson's Disease  
43 Questionnaire (PDQ-39): development and validation of a Parkinson's disease summary index  
44 score. *Age Ageing*. 1997;26(5):353-7. < >doi:<10.1093/ageing/26.5.353>  
45  
46  
47  
48  
49  
50  
51  
52  
53  
54  
55  
56  
57  
58  
59  
60

1  
2  
3  
4  
5  
6  
7  
8  
9  
10  
11  
12  
13  
14  
15  
16  
17  
18  
19  
20  
21  
22  
23  
24  
25  
26  
27  
28  
29  
30  
31  
32  
33  
34  
35  
36  
37  
38  
39  
40  
41  
42  
43  
44  
45  
46  
47  
48  
49  
50  
51  
52  
53  
54  
55  
56  
57  
58  
59  
60

For peer review only

## STROBE Statement—checklist of items that should be included in reports of observational studies

|                           | Item No.                                                                                            | Recommendation                                                                                                                                                                             | Page No.                                                                 | Relevant text from manuscript                                                             |
|---------------------------|-----------------------------------------------------------------------------------------------------|--------------------------------------------------------------------------------------------------------------------------------------------------------------------------------------------|--------------------------------------------------------------------------|-------------------------------------------------------------------------------------------|
| <b>Title and abstract</b> | 1                                                                                                   | (a) Indicate the study's design with a commonly used term in the title or the abstract                                                                                                     | 1                                                                        | "...a protocol for the PRIME-UK cross-sectional study"                                    |
|                           |                                                                                                     |                                                                                                                                                                                            | 2                                                                        | "In this single site cross-sectional study..."                                            |
|                           | (b) Provide in the abstract an informative and balanced summary of what was done and what was found | 2                                                                                                                                                                                          | Methods and analysis summarises what will be done<br>What was found- N/A |                                                                                           |
| <b>Introduction</b>       |                                                                                                     |                                                                                                                                                                                            |                                                                          |                                                                                           |
| Background/rationale      | 2                                                                                                   | Explain the scientific background and rationale for the investigation being reported                                                                                                       | 3                                                                        | Introduction (paragraphs 1-4)                                                             |
| Objectives                | 3                                                                                                   | State specific objectives, including any prespecified hypotheses                                                                                                                           | 4                                                                        | Paragraph 5 of introduction                                                               |
|                           |                                                                                                     |                                                                                                                                                                                            | 12                                                                       | Statistical analysis "Our a priori hypotheses are that we will show..."                   |
| <b>Methods</b>            |                                                                                                     |                                                                                                                                                                                            |                                                                          |                                                                                           |
| Study design              | 4                                                                                                   | Present key elements of study design early in the paper                                                                                                                                    | 4                                                                        | Study design and population section                                                       |
| Setting                   | 5                                                                                                   | Describe the setting, locations, and relevant dates, including periods of recruitment, exposure, follow-up, and data collection                                                            | 4                                                                        | Study design and population                                                               |
|                           |                                                                                                     |                                                                                                                                                                                            | 7                                                                        | Data collection: "Recruited participants will complete a single questionnaire booklet..." |
| Participants              | 6                                                                                                   | (a) <i>Cohort study</i> —Give the eligibility criteria, and the sources and methods of selection of participants. Describe methods of follow-up                                            |                                                                          |                                                                                           |
|                           |                                                                                                     | <i>Case-control study</i> —Give the eligibility criteria, and the sources and methods of case ascertainment and control selection. Give the rationale for the choice of cases and controls |                                                                          |                                                                                           |
|                           |                                                                                                     | <i>Cross-sectional study</i> —Give the eligibility criteria, and the sources and methods of selection of participants                                                                      | 5                                                                        | Inclusion/exclusion criteria                                                              |

|                           |    |                                                                                                                                                                                      |        |                                                                 |
|---------------------------|----|--------------------------------------------------------------------------------------------------------------------------------------------------------------------------------------|--------|-----------------------------------------------------------------|
|                           |    | (b) <i>Cohort study</i> —For matched studies, give matching criteria and number of exposed and unexposed                                                                             |        | N/A                                                             |
|                           |    | <i>Case-control study</i> —For matched studies, give matching criteria and the number of controls per case                                                                           |        |                                                                 |
| Variables                 | 7  | Clearly define all outcomes, exposures, predictors, potential confounders, and effect modifiers. Give diagnostic criteria, if applicable                                             | 8<br>5 | Methods of assessment and Inclusion criteria                    |
| Data sources/ measurement | 8* | For each variable of interest, give sources of data and details of methods of assessment (measurement). Describe comparability of assessment methods if there is more than one group | 7<br>8 | Methods of assessment section Table 1                           |
| Bias                      | 9  | Describe any efforts to address potential sources of bias                                                                                                                            |        |                                                                 |
| Study size                | 10 | Explain how the study size was arrived at                                                                                                                                            | 11/12  | Sample size section: “The sample size is pragmatic based on...” |

Continued on next page

|                        |     |                                                                                                                                                                                                                                                                                                           |                                                                                                                   |
|------------------------|-----|-----------------------------------------------------------------------------------------------------------------------------------------------------------------------------------------------------------------------------------------------------------------------------------------------------------|-------------------------------------------------------------------------------------------------------------------|
| Quantitative variables | 11  | Explain how quantitative variables were handled in the analyses. If applicable, describe which groupings were chosen and why                                                                                                                                                                              | Statistical analysis                                                                                              |
| Statistical methods    | 12  | (a) Describe all statistical methods, including those used to control for confounding                                                                                                                                                                                                                     | Statistical analysis                                                                                              |
|                        |     | (b) Describe any methods used to examine subgroups and interactions                                                                                                                                                                                                                                       | 12<br>Statistical analysis, 1 <sup>st</sup> paragraph                                                             |
|                        |     | (c) Explain how missing data were addressed                                                                                                                                                                                                                                                               | 12<br>Statistical analysis, 2 <sup>nd</sup> paragraph                                                             |
|                        |     | (d) <i>Cohort study</i> —If applicable, explain how loss to follow-up was addressed<br><i>Case-control study</i> —If applicable, explain how matching of cases and controls was addressed<br><i>Cross-sectional study</i> —If applicable, describe analytical methods taking account of sampling strategy | This is a cross-sectional where all eligible participants have been invited so sampling weights are not required. |
|                        |     | (e) Describe any sensitivity analyses                                                                                                                                                                                                                                                                     | Statistical analysis, 2 <sup>nd</sup> paragraph                                                                   |
| <b>Results</b>         |     |                                                                                                                                                                                                                                                                                                           |                                                                                                                   |
| Participants           | 13* | (a) Report numbers of individuals at each stage of study—eg numbers potentially eligible, examined for eligibility, confirmed eligible, included in the study, completing follow-up, and analysed                                                                                                         | N/A                                                                                                               |
|                        |     | (b) Give reasons for non-participation at each stage                                                                                                                                                                                                                                                      | N/A                                                                                                               |
|                        |     | (c) Consider use of a flow diagram                                                                                                                                                                                                                                                                        | N/A                                                                                                               |
| Descriptive data       | 14* | (a) Give characteristics of study participants (eg demographic, clinical, social) and information on exposures and potential confounders                                                                                                                                                                  | N/A                                                                                                               |
|                        |     | (b) Indicate number of participants with missing data for each variable of interest                                                                                                                                                                                                                       | N/A                                                                                                               |
|                        |     | (c) <i>Cohort study</i> —Summarise follow-up time (eg, average and total amount)                                                                                                                                                                                                                          | N/A                                                                                                               |
| Outcome data           | 15* | <i>Cohort study</i> —Report numbers of outcome events or summary measures over time                                                                                                                                                                                                                       | N/A                                                                                                               |
|                        |     | <i>Case-control study</i> —Report numbers in each exposure category, or summary measures of exposure                                                                                                                                                                                                      | N/A                                                                                                               |
|                        |     | <i>Cross-sectional study</i> —Report numbers of outcome events or summary measures                                                                                                                                                                                                                        | N/A                                                                                                               |
| Main results           | 16  | (a) Give unadjusted estimates and, if applicable, confounder-adjusted estimates and their precision (eg, 95% confidence interval). Make clear which confounders were adjusted for and why they were included                                                                                              | N/A                                                                                                               |
|                        |     | (b) Report category boundaries when continuous variables were categorized                                                                                                                                                                                                                                 | N/A                                                                                                               |
|                        |     | (c) If relevant, consider translating estimates of relative risk into absolute risk for a meaningful time period                                                                                                                                                                                          | N/A                                                                                                               |

Continued on next page

|                          |    |                                                                                                                                                                            |                           |
|--------------------------|----|----------------------------------------------------------------------------------------------------------------------------------------------------------------------------|---------------------------|
| Other analyses           | 17 | Report other analyses done—eg analyses of subgroups and interactions, and sensitivity analyses                                                                             | N/A                       |
| <b>Discussion</b>        |    |                                                                                                                                                                            |                           |
| Key results              | 18 | Summarise key results with reference to study objectives                                                                                                                   | N/A                       |
| Limitations              | 19 | Discuss limitations of the study, taking into account sources of potential bias or imprecision. Discuss both direction and magnitude of any potential bias                 | N/A                       |
| Interpretation           | 20 | Give a cautious overall interpretation of results considering objectives, limitations, multiplicity of analyses, results from similar studies, and other relevant evidence | N/A                       |
| Generalisability         | 21 | Discuss the generalisability (external validity) of the study results                                                                                                      | N/A                       |
| <b>Other information</b> |    |                                                                                                                                                                            |                           |
| Funding                  | 22 | Give the source of funding and the role of the funders for the present study and, if applicable, for the original study on which the present article is based              | 13      Funding statement |

\*Give information separately for cases and controls in case-control studies and, if applicable, for exposed and unexposed groups in cohort and cross-sectional studies.

**Note:** An Explanation and Elaboration article discusses each checklist item and gives methodological background and published examples of transparent reporting. The STROBE checklist is best used in conjunction with this article (freely available on the Web sites of PLoS Medicine at <http://www.plosmedicine.org/>, Annals of Internal Medicine at <http://www.annals.org/>, and Epidemiology at <http://www.epidem.com/>). Information on the STROBE Initiative is available at [www.strobe-statement.org](http://www.strobe-statement.org).
